# Supplementary material for: Whole genome analysis of selection associated with resistance to heat stress in chickens
Source: Research Square preprint supplement (doi:10.21203/rs.3.rs-7262298/v1), 2025-11-13
Supplement: Supplementary file 1 [file 412eda976018ecd3f67b7ae8.docx]

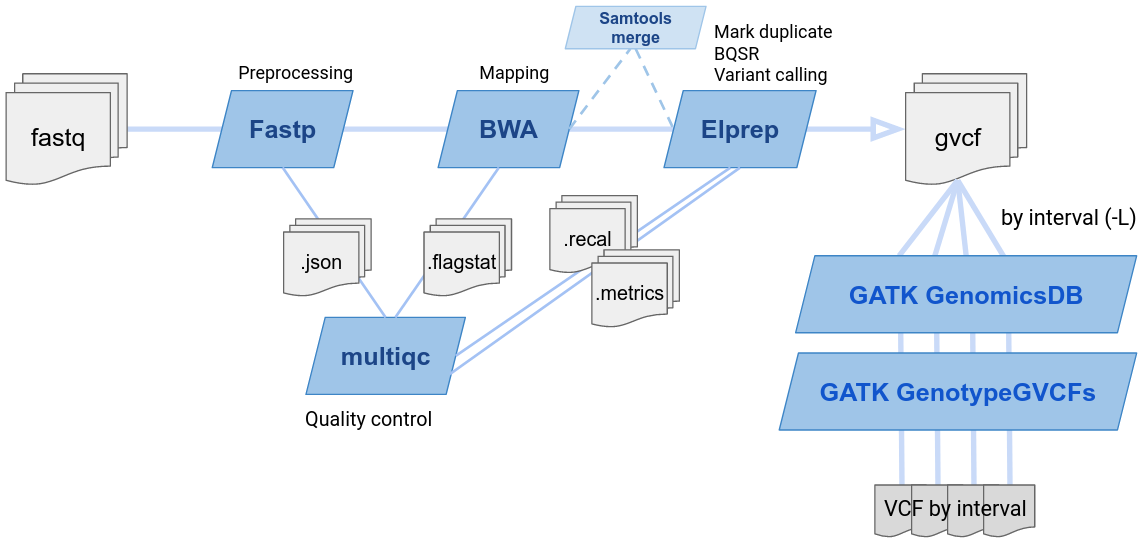


**Supplementary information, Fig. S1.** Processing Pipeline: To maintain consistency across samples, all datasets were re-processed starting from the raw fastq reads. The workflow included pre-processing and quality control of the reads, followed by alignment to the chicken genome assembly GRCg7b, variant calling, and the generation of a VCF file.


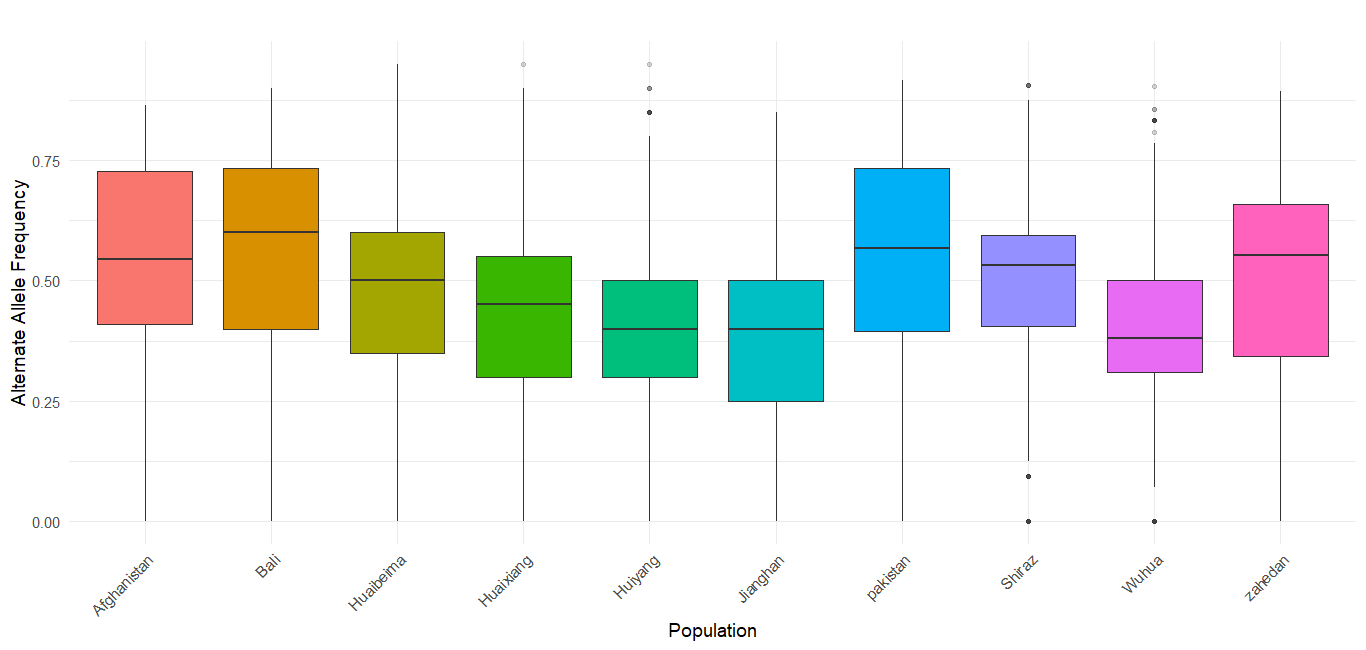


**Supplementary information, Fig. S2.** Distribution of Alternate Allele Frequency per Population.
