# Supplementary material for: Whole genome analysis of selection associated with resistance to heat stress in chickens
Source: Research Square preprint supplement (doi:10.21203/rs.3.rs-7262298/v1), 2025-11-13
Supplement: Supplementary file 4 [file ee7bbe6c248d9dd755ee4512.xlsx]

## Sheet: Heat stress
Gene
SPR
NFRKB
MFSD11
JMJD6
AP3S1
PACSIN1
ZFAND2A
PLEKHM2
MGST3
HKDC1
KCNJ2
SEMA3G
IPPK
BTK
ACKR2
PIK3CB
PRKAG2
SPTY2D1
LSP1P1
SLC24A1
KIAA1841
ATRX
KCTD2
HN1
NAMPTP1
VBP1
TUBB4B
SLC25A5
CUBN
ITGA8
BAG3
SLC7A11
CRIPT
C8B
AREG
FAP
HACL1
AMDHD1
WDR89
AKR1D1
LOXL4
PPFIBP1
PRKAA1
ABCA1
PHIP
SEPTIN10
CLN5
NEK3
MRPL35
SPECC1L
KCNB1
GPRC5C
PHLPP1
DYNC1H1
XRCC6
SLC10A7
ZNF385B
C9ORF152
SMCR8
MMGT1
CDKN2B
TFAP4
SDCBP2
PLPP2
ZNF207
HEPH
C8G
KIRREL1
VPS4B
POLR1B
NACA
TMTC2
RPP25L
MRPS18A
ZNF330
ITGA6
NR2F6
ENTPD2
NAA50
CBLL1
NBEAL2
IDH2
KIF21A
TSTA3
PPP2R5C
PUM3
TLK2
UGT8
FAM213A
TMC7
CLK4
NIPAL3
MFSD6
AOC1
ENSA
PDCD6IP
PHKA1
GLCCI1
ZC3H14
KIAA0232
RPP40
NECAP1
INHBA
GNGT2
NELFB
NCALD
ANKRD46
NRK
NR3C1
STT3B
FAM103A1
MTFMT
CFAP100
TIMD4
KCTD20
FUBP1
NTAN1
MFF
ENO1
HMGCL
RPN1
GTF2B
ACTB
SNRPA1
NDUFB1
PLXNB3
ARHGEF7
OGFR
BEND5
TAX1BP1
PODXL
TMEM132A
DTWD1
PARP12
SH2D3C
NFE2L2
NOX1
ZBTB7A
ELN
DGLUCY
NCAPH2
NAA35
NEBL
TTC13
HIPK2
RPS24
GLUL
MACC1
EIF4E
LRRFIP1
AGAP3
OXSR1
ASB12
DNM1
PSEN1
PAFAH2
COP1
DMD
NEO1
LYRM4
ARHGAP39
KIAA0513
ATP2A3
K123
TRIM9
COX11
HACE1
UBXN7
SYDE1
SPATA7
NA
HSF3
LOC772158
DOHH
KIAA1468
HSPB7L
LOC101749352
LOC121107673
LOC112533354
SERPINH1
HEATR8L5
HRC8L
DNAAF5
GUCY2C
MROH2BL23
HSFX2
LOC112530578
LOC124417001
HSPA4L
HSPE1
MROH6
HSFY2
MROH2B1
LOC121107829
LOC112532808
LOC112531199
LOC107057534
LOC107050089
LOC107049283
MROH2BL3
MROH2AL5
HSFY1
HEATR7B2L1
LOC121109301
LOC121107832
LOC121107639
LOC121107132
LOC112531330
LOC107055553
LOC107049118
HSPB11
AHSA2
MROH2BL2
MROH2BL20
MROH2BL5
MROH2BL13
MROH7L7
MROH7L5
HSFX1
HSFX4
HSFX5
HSFX6
HSFY3
HSFX3
LOC100857292
LOC121109494
LOC121108498
LOC121108315
LOC121108314
LOC121108313
LOC121107697
LOC121107643
LOC121107623
LOC121106489
LOC112532821
LOC112532805
LOC112531281
LOC112531221
LOC112531214
LOC112530643
LOC112529939
LOC107057518
LOC107057129
LOC107056965
LOC107056924
LOC107055619
LOC107049453
LOC121112656
LOC121112104
LOC121109189
LOC121107833
LOC121107134
MROH2BL27
MROH7L2
MROH5
HEATR7B1
HEATR8L3
HSF1L
HSFX7
HSFX8
HSFX9
HASFX10
LOC121109497
LOC121108102
LOC121108066
LOC121108064
LOC121108060
LOC121107640
LOC121107632
LOC121107631
LOC121107617
LOC121107304
LOC121107137
LOC121106503
LOC107056943
LOC107049810
LOC124416954
LOC121112458
LOC121109498
LOC121109362
LOC121109346
LOC121109318
LOC121109299
LOC121109188
LOC121106661
LOC112532719
LOC112531496
HEATR8L2
LOC107052395
LOC124416996
LOC124416964
LOC124416962
RIDA
HSPBAP1
DNAJB1
LOC107050255
LOC112530684
LYZ
OVAL
CALB1
IL6
PTGES3
MTOR
APOB
CNOT1
SPAG6
PDS5B
AP2A2
CLASP2
IPO11
AP3B2
TDRD12
RPTOR
PPP4R1
ARMC8
HTT
NCAPD3
AP2B1
AP1B1
COPG2
USP19
BRAT1
CLASP1
NIPBL
PPP4R4
CEP104
INTS4
RSPH14
FAM65A
LOC427025
SEMA3A
SHQ1
LOC421690
LOC121112127
LOC121106548
PDS5A
PIK3R4
AP1G1
SCYL2
AP3D1
IPO5
SF3B1
NCAPG
CAND1
GCN1
PPP4R1L
LOC107057545
NUDCD1
NCAPG2
UBQLN1
LOC121112128
COPB1
PSME4
CKAP5
CAND2
SCYL1
ODF1
ATR
MORC4
LOC121112103
LOC107049117
CRH
KPNB1
KPNA6
ARVCF
API5
AP4B1
AP3B1
TNPO1
BTAF1
RSPRY1
TMCO7
PTGES3L
TLR15
FAM65B
KPNA7
PIH1D2
LOC101748457
PSMD1
PAM16
SCYL3
SUGT1
UBAC1
VAC14
PSMD5
COPG1
ECPAS
DNAAF2
TNPO2
POU2F1
PMS2
ST13P5
UBQLN4
MORC1
GAK
LOC425431
LOC121108448
LOC121112659
LOC121112657
LOC121112096
LOC107049856
FKBPL
LOC107049599
SELENOK
TPO
XBP1
NMT2
NMT1
LOC107049478
LOC101751321
LOC101748870
Hspb3
DNAJA3
HSP90AB1
JS82_RS07210
HSBP1L1
HSPA8
HSPB2
HSP90AA1
HSPA2
HSBP1
HSPA14
HSPA13
HSPB9
HSPB1
LOC128089093
HEATR5A
HSF4
DNAJA1
DNAJA2
HSPA9
DNAJA4
HSPA5
DNAJC9
HEATR5B
CARHSP1
HEATR6
LOC128074942
HSPH1
HEATR3
HEATR1
HSF2
HSF2BP
LOC128081283
LOC128075824
LOC128075806
OG872_RS15795
EL247_RS03950
ABDZ49_RS06985
GLP24_RS13385
FDH36_gp229
FDH36_gp226
hrcA
HSPB7
HSPA4
HSPD1
OG872_RS28240
OG872_RS06470
DNAJC15
HSPB8
HSF5
HSPB3
HSF1
HSPA12A
OG872_RS06475
hslR
KMC31_gp025
KMC31_gp022
LOC128084327
LOC128072091
LOC128090679
LOC128090678
LOC128090676
LOC128090673
LOC128086149
LOC128086139
LOC128084565
LOC128079145
LOC128078760
LOC128078639
LOC128076599
LOC128076579
LOC128076569
LOC128076526
LOC128076525
LOC128076524
LOC128076520
LOC128076459
LOC128076406
LOC128076192
LOC128076191
LOC128074946
LOC128074198
LOC128073757
LOC128073755
LOC128073751
LOC128072793
LOC128072700
LOC128072181
LOC128072180
LOC128072179
LOC128072178
LOC128072176
LOC128072175
LOC128072174
LOC128072173
LOC128071754
LOC128071752
LOC128071751
LOC128071702
LOC128071701
LOC128071700
LOC128081856
LOC128073262
DNAJB13
RELCH
DNAJC17
DNAJB11
DNAJB5
DNAJC21
HSP90B1
DNAJC6
DNAJB4
DNAJC3
DNAJC22
DNAJC14
DNAJC25
DNAJC7
DNAJC8
DNAJC1
DNAJB6
DNAJC13
DNAJC27
DNAJC24
DNAJC11
DNAJC19
DNAJC18
DNAJC5
DNAJB14
DNAJC2
DNAJB8
DNAJC12
DNAJB12
DNAJC10
DNAJB2
HIKESHI
DNAJB9
DNAJC5B
DNAJC16
DNAJC5G
DNAJC30
DNAJC28
LOC128091478
LOC128084539
LOC128084517
LOC128083726
LOC128076571
LOC128076470
LOC128076461
LOC128076405
LOC128073754
LOC128073260
LOC128073233
LOC128072936
LOC128072935
LOC128072292
Trpv1
TP53
AKT1
CASP8
ckap5
TRPV4
Myd88
VEGFA
APP
IL1B
HNRNPK
SRC
Pkp4
Il18
DQL78_RS00715
DQL78_RS02900
DQL78_RS05130
DQL78_RS11035
LI74_RS27840
MRE11
CXCL8
lmo7b
FC33_RS01605
ybeY
GLP24_RS10245
FC33_RS01835
Av05_00149
CRYAB
POLR2D
CDC37
CRYAA
CLPB
htpX
FC33_RS05140
CDC37L1
TOMM34
SLC27A1
CKV65_RS07100
CKV65_RS07095
CKV65_RS07090
grpE
htpG
LOC128090652
PRNP
Ptk2
TRAP1
LOC128076619
MAPK3
Mapk1
Bmp4
Tlr9
PIK3R1
APOBEC3G
NBN
Sirt1
AHSA1
PDAP1
GHR
NEWENTRY

## Sheet: FST
Gene
AAK1
AARS2
AARSD1
ABCA3
ABCB1
ACSS2
ACSS3
ADAM22
ADCY1
ADGB
ADGRB3
ADGRD1
ADRA1B
ADSL
ADTRP
AFDN
AFG3L2
AHI1
AIFM1
AIFM2
AKAP6
AKR1D1
AKTIP
ALDH8A1
AMFR
AMPH
ANKRD11
ANKRD33B
ANTXR1
APELA
ARFGEF2
ARHGAP12
ARHGAP18
ARHGAP31
ARHGAP32
ARL5B
ASIC2
ASNS
ASPA
ASZ1
ATN1
ATP1A1
ATP2B1
ATP6V1A
ATP6V1C2
ATP9A
ATXN3
AUP1
AUTS2
B4GALT4
BBS10
BCAP29
BCAR1
BCORL1
BLOC1S5
BMP4
BRAT1
BRCA1
BTBD9
C12orf50
C12orf57
C1GALT1
C1QL3
C1R
C1S
C2H6orf52
C4orf19
CACNB2
CACNG1
CACNG4
CACNG5
CADM2
CALM1
CAMK2D
CASQ2
CAV2
CBLB
CBR4
CCDC142
CCDC167
CCDC170
CCDC59
CCDC88C
CCDC91
CCND2
CCNDBP1
CCNF
CCR6
CD109
CD247
CD48
CD8A
CD9
CDCA3
CDH1
CDH23
CDH3
CDH4
CDK10
CDK2
CDKAL1
CDKN1B
CEP128
CEP250
CEP290
CEP43
CFDP1
CFTR
CHD1L
CHD9
CHMP1A
CHMP1B
CHMP3
CHST3
CIDEA
CLCN1
CLSTN3
CMTR1
CMTR2
CNR2
COBL
COG5
COG8
COL12A1
COL19A1
COL28A1
COPA
COX7A2
CPE
CPNE1
CPNE7
CPPED1
CPSF2
CRADD
CRAMP1
CREBL2
CREG1
CRMP1
CRNN
CSE1L
CTNS
CTRB1
CUBN
CYB5B
DAAM2
DAD1
DAP
DBNDD1
DDX1
DEF8
DGKA
DHH
DIO2
DLGAP2
DNAH8
DOCK2
DOK1
DPEP1
DPY19L3
DUS4L
DUSP12
DUSP16
DUSP6
DYNLT1
E2F3
E2F6
EDA2R
EDBETA
EDEM2
EDYM1
EEF1E1
EFCAB2
EGLN3
ELOVL2
EMC6
EMG1
ENO2
ENOX2
EP300
EPB42
EPC1
EPHA1
EPHB6
EPM2A
EPS8
ERBB3
ERCC4
ERGIC3
ERICH1
ESR1
ESRRB
EVC
EVC2
EYA2
EZR
FABP2
FAM131B
FAM20C
FAM217B
FAM46C
FANCA
FAR2
FBLN1
FBLN2
FBLN5
FBXO11
FBXO30
FBXO5
FERRY3
FGF23
FGF6
FILIP1
FKBP4
FLI1
FOXI1
FOXJ2
FOXM1
FOXN1
FOXN2
FSTL1
FTO
FUCA1
G6PC1
GALE
GALNT17
GAS8
GATB
GCM2
GDAP2
GDF5
GFOD1
GFPT1
GFRAL
GKN1
GKN2
GLO1
GNAO1
GNB3
GPI
GPR174
GPR19
GPR83L
GRAMD4
GREB1
GRHL3
GRM1
GSPT2
GSS
GUCA1C
HAAO
HASPIN
HBS1L
HCRTR2
HDAC11
HECW1
HELZ
HEPH
HIVEP2
HJURP
HMGCL
HMGCLL1
HSF3
HTRA2
HYDIN
IBTK
ID4
IFI35
IFNLR1
IFT140
IGF1
IGFBP1
IGFBP3
IKZF1
IKZF4
IL22RA1
IMMT
INSYN2B
ITFG2
ITGA8
ITM2A
ITPR2
JAG1
JPT2
KCNA1
KCNB1
KCNF1
KCNG3
KCNH8
KCNJ1
KCNJ5
KCNK13
KCNK16
KCNK17
KCNK5
KCNQ5
KCTD12A
KDM3A
KIAA0930
KIF12
KIF13A
KIF25
KIF26B
KIF5B
KIF6
KITLG
KLHL2
KMT2D
LAMA2
LARGE1
LBFABP
LBX2
LCORL
LDHD
LMBR1L
LMBRD1
LOXL3
LPCAT3
LPIN1
LRFN2
LRP6
LRRC23
LRRC58
LSAMP
LYPLA2
M1AP
MAB21L3
MACROH2A2
MAK
MALRD1
MARS2
MAT2A
MBIP
MBOAT1
MC1R
MCU
MCUR1
MDGA1
METTL25
MGAT4C
MINDY3
MINPP1
MKKS
MKLN1
MOCS1
MPC2
MPP2
MPP7
MPZL1
MRPL35
MRPL42
MRPS35
MRTFA
MRTFB
MSH6
MSMO1
MSN
MT4
MTRF1L
MYB
MYCT1
MYOM2
MYOM3
MYOZ2
NAA50
NAP1L1
NBAS
NBR1
NCAPG
NCOA3
NCOR2
NCSTN
NDRG3
NDST4
NDUFA4
NDUFA9
NECAP1
NFAT5
NFATC2
NFKBIE
NFS1
NFU1
NHLH1
NHLH2
NIP7
NMUR2
NOB1
NOL10
NOL7
NPAS3
NPSR1
NQO1
NRDE2
NRP1
NRXN3
NSUN6
NTAN1
NTF3
NTS
NUP210
NUP93
NWD2
ODAD2
OIT3
OPHN1
OPRM1
OSBPL8
P2RX5
P3H3
PA2G4
PAK1IP1
PAPSS2
PARP11
PAWR
PCDH7
PCGF1
PDE1C
PDE5A
PDE7B
PDF
PDIA6
PDXDC1
PEX5
PHACTR1
PHACTR3
PHB2
PHF14
PHF20
PHLDA1
PIEZO2
PIGL
PIK3C2G
PITHD1
PITPNM2
PLA2G12B
PLCZ1
PLEKHA7
PLXDC2
PMEL
PNRC2
POC1B
PODXL
POLDIP2
POU6F2
PPFIA2
PPIF
PPP1R3D
PPP2R2C
PPP4R3A
PRELID3A
PREX1
PRIMA1
PRKAG1
PRKCA
PRKG1
PRL
PRMT8
PRSS2
PSAP
PSMC1
PSMD7
PTCD3
PTER
PTGES3L
PTHLH
PTPN6
PTPRK
PTPRO
PTPRT
PUS7
PYM1
RAB33A
RAB5B
RAD51AP1
RAN
RANBP9
RBL2
RBM12
RBM39
RBX1
RCSD1
REEP1
RFLNA
RGS17
RIBC2
RIMBP2
RINT1
RLIG1
RMND5A
RNASET2
RND2
RNF103
RNF144B
RNF182
RNF8
ROBO1
ROCK2
ROMO1
RPGRIP1L
RPL13
RPL27
RPS26
RPS6KA2
RPS6KA5
RRN3
RSL1D1
RSU1
RUNDC1
RUNDC3B
RYR2
S100A11
SALL1
SALL4
SARM1
SAYSD1
SCAF8
SEMA5A
SGMS1
SGSM3
SHANK2
SHISA9
SHPK
SHPRH
SIRT5
SLAMF1
SLC12A3
SLC13A2
SLC13A3
SLC16A7
SLC22A15
SLC25A14
SLC25A17
SLC25A40
SLC26A4
SLC2A10
SLC35B2
SLC46A1
SLC6A15
SLIT3
SLX4IP
SMC1B
SMG6
SMIM13
SMYD3
SNAP25
SNTB2
SNX29
SOCS2
SPAG17
SPATA17
SPATA22
SPDL1
SPG7
SPIRE1
SPIRE2
SPMIP7
SPOCK3
SRI
SRPK2
SRR
SRSF10
ST13P5
ST7
STARD8
STAU1
STEAP4
STK32B
STX2
SULF2
SUOX
SYCP2L
SYNPO2
SYT1
SYT10
SYTL3
TAC1
TAGAP
TANGO6
TARP
TAS2R40
TAX1BP3
TBC1D7
TBX15
TBX20
TBX22
TC2N
TCEB3
TCF25
TCTE1
TEAD4
TERF2
TES
TFEC
TGM3
TGM6
THSD7A
TMED6
TMEM106B
TMEM151B
TMEM170B
TMEM181
TMEM192
TMEM199
TMEM204
TMEM30A
TMEM39A
TMTC2
TMTC3
TNRC6B
TNS3
TOX2
TOX3
TPBG
TPI1
TRAT1
TRDMT1
TRIP11
TRPC4AP
TRPV1
TRPV2
TRPV3
TSHR
TSHZ3
TTC1
TTC7B
TTYH3
TUBA1A
TUBA1C
TUBB3
TUBB6
TULP3
TXNDC5
UBA2
UBE2N
UNC119
UNC79
UPK1B
UPK3A
UQCC1
URAH
USF3
USP5
USP53
VAC14
VANGL1
VANGL2
VAT1
VIP
VPS41
VPS4A
VPS9D1
VSIG4
VTN
VWC2
VWF
WARS2
WDR3
WDR59
WNT2
WTIP
WWP2
XPNPEP3
YIPF6
YLEC12
YLEC17
ZCCHC24
ZFAND3
ZMIZ1
ZMYND8
ZNF276
ZNF507
ZNF804B
ZNFX1
ZNRF1
ZPBP1
ZYX

## Sheet: PI
Gene
ZYX
ZWILCH
ZPBP1
ZP2
ZNRF1
ZNFY4
ZNFY3
ZNFY2
ZNFB3
ZNFB1
ZNF804B
ZNF740
ZNF710
ZNF618
ZNF507
ZNF469
ZNF410
ZMYND8
ZFYVE21
ZFP36L2
ZFAND3
ZC4H2
ZC3H12B
ZBTB33
ZBTB22
ZBTB20
YPEL2
YLEC17
YLEC12
XRCC3
XPO7
XPNPEP3
WWP2
WWOX
WSCD1
WSB1
WNT7A
WNK4
WIPF3
WDR59
WDR3
WDR25
WARS2
VWC2
VTN
VSTM2A
VSIG4
VPS41
VPS33B
VOPP1
VKORC1
VIP
VAT1
VASH2
VASH1
VANGL2
VANGL1
VAC14
USP7
USP53
USP5
USP4
USP10
UQCRC2
UQCC1
UPK1B
UPF3B
UNC79
UNC119
UGT8
UFL1
UCK1
UBE3C
UBE2V1
UBE2N
UBALD1
UAP1L1
TXNDC5
TXLNB
TWISTNB
TUNAR
TULP4
TULP1
TUFT1
TUBG1
TUBB6
TUBA1C
TUBA1A
TTYH3
TTLL5
TTLL13
TTLL12
TTLL1
TTC9
TTC7B
TTC7A
TTC1
TSPO
TSPAN19
TSPAN12
TSHZ3
TRPC5
TRPC4AP
TRMT61A
TRIT1
TRIM7.2
TRIM7.1
TRIM33
TRIM2
TRDMT1
TRAPPC6A
TRAPPC3
TRAPPC11
TRAP1
TRAF5
TPST2
TPPP
TPM4
TPK1
TPI1
TPCN1
TPBG
TOX3
TOX2
TNS3
TNRC6B
TNIP1
TNFAIP2
TNFAIP1
TMX3
TMTC2
TMPRSS15
TMEM97
TMEM9
TMEM39A
TMEM255A
TMEM204
TMEM199
TMEM196
TMEM192
TMEM189
TMEM183A
TMEM181
TMEM170B
TMEM151B
TMEM106B
TMED3
TM2D3
TLR21
TLL1
TJP1
TIPIN
TINCR
TIMM21
THSD7A
THSD4
THRAP3
THADA
TGFB3
TFIP11
TFEC
TEX264
TES
TERT
TENM2
TENM1
TEKT2
TEKT1
TECRL
TEAD3
TCTE1
TCOF1
TCF15
TCEB3
TBX22
TBX20
TBX15
TBK1
TBCK
TBC1D7
TBC1D5
TBC1D32
TBC1D22B
TBC1D20
TATDN3
TASOR
TARSL2
TARP
TARBP1
TAMALIN
TAGAP
TAFA2
TAC1
SYTL3
SYT6
SYT16
SYT10
SYT1
SYNPO
SYNM
SYNJ2BP
SYNE3
SYCP1
SVIP
SUOX
SULF2
SUGCT
STX2
STRBP
STOX2
STON2
STK40
STK32B
STK32A
STEAP4
STC1
STAU1
ST13P5
SRXN1
SRSF6
SRSF10
SRRD
SRR
SRPK2
SRPK1
SRI
SPRYD3
SPP1
SPOCK3
SPIRE1
SPDL1
SPATA20
SPATA2
SPATA17
SPARC
SPAG17
SOX6
SOX12
SORBS3
SOCS2
SNX5
SNX27
SNAPC5
SNAP25
SNAI1
SMYD3
SMYD2
SMTNL2
SMPD2
SMIM3
SMIM29
SMIM20
SMIM13
SMG6
SLX4IP
SLX4
SLTM
SLITRK2
SLIT3
SLIT2
SLC9A8
SLC9A3
SLC8A1
SLC7A6
SLC7A11
SLC6A7
SLC6A5
SLC6A19
SLC6A18
SLC6A15
SLC6A11
SLC6A1
SLC5A12
SLC52A3
SLC46A1
SLC35F3
SLC30A1
SLC2A14
SLC2A10
SLC27A1
SLC26A8
SLC26A4
SLC26A3
SLC25A40
SLC25A17
SLC25A14
SLC23A2
SLC22A15
SLC17A6
SLC16A7
SLC13A5
SLC13A3
SLC13A2
SLC12A3
SLAMF8
SLAMF1
SIKE1
SHPRH
SHANK2
SH2D1A
SGSM3
SGSM2
SGMS2
SFRP2
SEZ6L
SERINC1
SENP6
SEMA5A
SEMA4B
SEMA3A
SELENOK
SEL1L3
SEL1L
SEC61G
SEC23A
SDR42E1
SDK1
SCUBE1
SCRT2
SCN8A
SCIN
SCAF8
SAYSD1
SATB1
SARM1
SALL4
SALL1
S100A11
RYR2
RWDD4
RUNDC3B
RUNDC1
RSU1
RSPO4
RRBP1
RPS6KA6
RPS6KA5
RPS6KA2
RPS26
RPS16
RPS14
RPS10
RPL4
RPL39L
RPL27
RPL11
RPGRIP1L
ROMO1
ROBO2
ROBO1
RNF8
RNF182
RNF144B
RNF114
RNF111
RND2
RIPOR3
RINT1
RHOA
RHBG
RGS17
RGS12
RGL2
REM1
REEP2
RD3
RCOR3
RCAN3
RBX1
RBPJ
RBM39
RBM22
RBM19
RBM12
RBL2
RASSF9
RASSF6
RASSF3
RASSF2
RASGEF1B
RARG
RAPGEF1
RAP1GAP2
RAN
RAMP2
RAD51AP1
RAB5B
RAB5A
RAB33A
RAB28
RAB11A
PYM1
PXDC1
PUS7
PURA
PTRH2
PTPRT
PTPRQ
PTPRO
PTPRK
PTPN6
PTPN14
PTPN1
PTHLH
PTGES3L
PTER
PSMF1
PSME3
PSMD7
PSMC3IP
PSMB5
PSAP
PRSS2
PRRT1B
PRR11
PROM2
PRNP
PRMT3
PRL
PRKG2
PRKG1
PRKD1
PRKCA
PRKAG1
PRIMA1
PRF1
PREX1
PRELID3A
PRDM5
PRCC
PRC1
PPT1
PPP2R2C
PPP2R2B
PPP1R3D
PPIP5K1
PPFIA2
PP2D1
POU6F2
POU3F4
POU3F2
POPDC3
POMT1
POLR2M
POLN
POLDIP2
PODXL
POC1B
PNRC2
PNN
PNAT3
PNAT10
PMEL
PLXDC2
PLEKHH3
PLEKHH2
PLEKHA7
PLCG2
PKP1
PKIB
PKD2
PITPNM3
PITHD1
PIM1
PIK3CG
PIK3C2G
PIGS
PIEZO2
PHLDA1
PHF20
PHB2
PHACTR1
PGLS
PGK2
PFDN2
PEX5
PEAR1
PDIA6
PDIA3
PDGFRB
PDE7B
PDE5A
PDE1C
PCNX2
PCGF1
PCDH7
PCDH18
PAWR
PARD6B
PARD3
PAPSS1
PAK1IP1
PAFAH1B1
PACSIN2
PA2G4
P3H3
OZFL1
OVOL2
OTUD4
OTOGL
OSCP1
OSBPL8
OPRM1
OMG
OGFOD1
ODAD2
NWD2
NUP93
NUDT3
NUDT21
NTS
NTRK1
NT5DC1
NSUN6
NSL1
NRXN3
NRSN2
NRP1
NRG2
NRAS
NR4A1
NQO1
NPSR1
NPM2
NPAS3
NOM1
NOL10
NOB1
NMUR2
NLK
NKX2-3
NKAPL
NIPAL3
NHLH2
NHLH1
NFU1
NFS1
NFATC2
NFAT5
NF1
NETO1
NES
NELL1
NEIL3
NEDD9
NECAP1
NDUFA1
NDST4
NDST1
NDRG4
NDRG3
NCSTN
NCOA3
NCAPG
NBR1
NBAS
NAT8L
NAT
NAP1L1
NANOG
NAGLU
NAA50
MYOZ2
MYOM3
MYOM2
MYO6
MYO1E
MYO18B
MYCT1
MYCL
MTRR
MTNR1A
MT4
MSN
MSMO1
MSI2
MSANTD1
MRTFA
MRPS5
MRPS35
MRPL9
MRPL42
MRPL24
MPPE1
MPP7
MPP2
MPHOSPH6
MOCS3
MOCS1
MNX1
MNT
MND1
MKX
MKLN1
MKKS
MINDY2
MICAL1
MHCY2B2
MGRN1
MGME1
MGAT4F
MFSD5
MFSD2A
METTL25B
METTL25
METTL15
MESP1
MEIS2
MEGF11
MED6
MED31
MDGA1
MCTS1
MCAT
MBOAT1
MATCAP2
MAT2A
MARS2
MARF1
MAPK14
MAPK13
MAP7D1
MAP3K21
MAP2K1
MAP1A
MANSC4
MAN2B2
MAN1B1
MAN1A2
MALRD1
MAGT1
MACROH2A2
MACROD2
MACC1
MAB21L3
M1AP
LYRM9
LYPLA2
LY86
LSM10
LSAMP
LRRC71
LRRC4C
LRRC49
LRRC23
LRRC14B
LRP6
LRFN2
LRBA
LPCAT3
LOXL3
LMBRD1
LMBR1L
LIPC
LINS1
LINGO3
LIN7C
LIN28B
LIG1
LHX5
LHX2
LHFPL5
LGR4
LFNG
LDHD
LDAF1
LCORL
LBX2
LBFABP
LAS1L
LARP6
LARGE1
LANCL2
LAMP2
LAMA2
LAG3
KMT2D
KLHL42
KLHL4
KLHL2
KLC1
KIFC1
KIF6
KIF5B
KIF26B
KIF21B
KIF18A
KIF12
KIAA0753
KHDRBS2
KDM3B
KCTD12A
KCNQ5
KCNK5
KCNK17
KCNK16
KCNJ5
KCNJ1
KCNH8
KCNH1
KCNG1
KCNF1
KCND2
KCNB1
KCNA1
KATNBL1
KAT8
KAT2B
KAT14
JPT2
JARID2
JAKMIP2
JAG1
ITPR2
ITM2A
ITGB7
ISG20L2
IRX2
INSYN2B
INSRR
INHBA
ING3
ING2
IMPG1
IMPA2
IL8L2
IL8L1
IL4I1
IL22RA1
IL12B
IKZF4
IGSF3
IGFBP3
IGFBP1
IGF1R
IFT43
IFT20
IFT140
IFNLR1
IFI35
IDH2
ID4
ID1
IBTK
HYDIN
HTRA2
HTR1B
HSPB2
HSF3
HSF2
HSD17B2
HSD17B1
HPS4
HPCAL4
HMOX2
HMGCLL1
HMGCL
HMGA1
HM13
HJURP
HIVEP2
HHIP
HEPH
HELZ
HECA
HDX
HDGF
HDDC3
HCRTR2
HAUS3
HAPSTR1
HAPLN2
HAAO
GUCA1C
GSG1L2
GRM4
GRM2
GRM1
GRID2
GRHL3
GR42L6
GPX3
GPX1
GPR83L
GPR63
GPR19
GPR174
GPR162
GPR15
GNS
GNRHR
GNB3
GNAO1
GNAL
GLRX5
GLP2R
GLO1
GLI3
GKN2
GKN1
GINS3
GINS1
GIMD1
GHRHR
GFRAL
GFRA3
GFRA2
GFPT1
GFOD1
GEMIN2
GDPGP1
GDPD1
GDF5
GDAP2
GATB
GAS7
GALNTL6
GALNT17
GALE
GABRB2
GABBR2
G6PC1
G3BP1
FUT9
FUCA1
FTO
FRK
FOXN1
FOXJ2
FOXI1
FMR1NB
FMR1
FLVCR1
FLRT2
FLI1
FKBP5
FKBP4
FILIP1
FIGNL2
FIGNL1
FIBIN
FHOD3
FHL5
FHIP1A
FGF16
FFAR2L7
FERRY3
FERD3L
FDXACB1
FBXO5
FBXO39
FBXO38
FBXO33
FBXO30
FBXO15
FBXL4
FBLN1
FAT2
FAT1
FASTKD3
FAR2
FANCF
FAM83DL
FAM46C
FAM217B
FAM161B
FAM131B
FAM110A
FABP2
F13A1
F11
EZR
EZH1
EYA2
EXOC3L4
EVI2A
EVC2
EVC
EVA1B
ETV3
ETV1
ESRRG
ESRRB
ESR1
ESPL1
ERNI
ERICH1
ERGIC3
ERC2
ERBB3
EPS8
EPM2A
EPHB6
EPHA6
EPHA5
EPHA1
EPC1
EPB41L1
EP300
ENTPD5
ENS-1
ENOX2
ENO2
EML4
EMG1
EMC3
ELP2
ELF3
EIF5
EIF4A3
EHD4
EGR1
EGLN3
EGFR
EFHB
EFCAB2
EFCAB10
EEPD1
EEF1E1
EDYM1
EDMPN2
EDEM2
EDCH3
EDBETA
EDA2R
E2F3
DZANK1
DYNLT1
DYNLRB2
DUSP16
DUSP12
DUS4L
DTNBP1
DTHD1
DSEL
DPYSL3
DPYSL2
DPY19L3
DPP7
DPM1
DOK6
DOK2
DOK1
DOCK3
DOCK2
DNAJB6
DNAH8
DMTN
DLK1
DLGAP4
DLGAP2
DLG5
DLC1
DIS3L
DIO3
DIO2
DIAPH2
DHX40
DHRS7C
DHRS4
DHH
DGKB
DGKA
DENND2C
DENND1A
DDOST
DDC
DCX
DCTN4
DBF4
DAXX
DAP
DAD1
DACH2
DAAM2
CYSTM1
CYLD
CYB5B
CUL4B
CUBN
CTRB1
CTBPL
CSNK2A2
CSNK2A1
CSMD1
CSE1L
CSDE1
CSAD
CRYM
CRYBG1
CRYBB1
CRYBA4
CRYAB
CRNN
CRISPLD2
CRHR1
CREBL2
CRB2
CRAMP1
CRADD
CRABP2
CPNE4
CPNE1
CPED1
CPE
COX7B
COQ6
COPA
COL8A2
COL28A1
COL21A1
COL19A1
COL12A1
COL10A1
COG5
COBL
COASY
COA8
COA6
COA3
CNTNAP2
CNTNAP1
CNTD1
CNR2
CMTR2
CMTR1
CMIP
CLUH
CLTC
CLSTN3
CLPS
CLDND1
CLCN1
CKMT1B
CITED2
CIDEA
CIB1
CHST3
CHMP1B
CHIR1AB3
CHIC1
CHDH
CHD9
CHD1L
CFDP1
CFAP90
CFAP68
CFAP263
CFAP20
CERS3
CEP250
CEP128
CEBPB
CDYL2
CDX4B
CDX1
CDS2
CDKN2AIP
CDKN1B
CDKAL1
CDK2
CDIP1
CDIN1
CDH7
CDH4
CDH23
CDH13
CDH10
CDCA3
CDC23
CD74
CD48
CD4
CCSER1
CCR10
CCNF
CCNB1
CCDC92B
CCDC91
CCDC71L
CCDC69
CCDC66
CCDC59
CCDC34
CCDC170
CCDC167
CCDC127
CCDC102B
CBLN2
CBLL1
CBLB
CASQ2
CAPN6
CAP1
CAMKMT
CAMK2D
CAMK2A
CALCR
CADM2
CACNG5
CACNG4
CACNG1
CACNA2D3
CACNA1S
CACNA1G
C4orf19
C2H6orf52
C1S
C1R
C1QL3
C1GALT1C1
C1GALT1
C14orf132
C12orf57
C11orf58
C11orf52
BVES
BTBD9
BTBD3
BRPF3
BRCA1
BORCS5
BMP6
BMP5
BMP4
BMP3
BMP2
BMP10
BMERB1
BLVRA
BLOC1S5
BLEC3
BIRC5
BIN3
BIK
BGV
BG8
BEGAIN
BECN1
BDNF
BCORL1
BCL2L1
BCL11A
BCKDK
BCAS2
BCAR1
BCAP29
BCAN
BBS2
BBS10
BBOX1
BATF3
BASP1
BANP
BAG5
B4GALT5
B4GALT4
AUTS2
AUP1
ATXN7L1
ATRX
ATP9A
ATP7A
ATP6V1C2
ATP6V1A
ATP6V0A1
ATP2B4
ATP2B1
ATP1B4
ATP1A1
ATP10B
ATN1
ATL2
ATG5
ATG101
ATF3
ASPHD2
ASNS
ASIC2
ARSI
ARL6
ARL5B
ARL4A
ARHGEF11
ARHGAP32
ARHGAP31
ARHGAP25
ARHGAP18
ARHGAP12
ARFGEF2
AR
AQP1
APELA
AP3S2
AOAH
ANXA6
ANTXR1
ANPEP
ANO5
ANO3
ANLN
ANKS6
ANKS4B
ANKRD33B
ANKMY1
ANGPT4
ANGEL1
ANAPC10
AMPH
AMPD1
AMOT
AMFR
ALG9
ALG13
ALDH6A1
ALDH1A2
AKTIP
AKR1D1
AKAP14
AKAP1
AIMP1
AIFM2
AIFM1
AHI1
AGO3
AGO1
AGA
AFP
AFG3L2
AFF2
ADTRP
ADSL
ADRA1B
ADPRHL2
ADPRH
ADNP
ADGRD1
ADGRB3
ADCY2
ADCY1
ADAMTS18
ADAMTS17
ADAM28
ADAM22
ADAM10
ADAL
ACVR1B
ACTR8
ACTL9
ACSS3
ABCE1
ABCB1
ABCA3
AARSD1
AARS2
AAR2
AAK1

## Sheet: tajima
Gene
PCLO
ARF5
GCC1
DENND6B
PPP6R2
DHRS4
SBF1
CACNA2D1
HGF
ADM2
LMF2
MIOX
NCAPH2
SCO2
IRF5
SEMA3C
TNPO3
CD36
GNAT3
GNAI1
SMO
AHCYL2
MAGI2
STRIP2
SMKR1
NRF1
PHTF2
TMEM60
RSBN1L
PTPN12
GSAP
CCDC146
FGL2
FAM185A
FBXL13
LRRC17
UBE2H
ARMC10
NAPEPLD
PMPCB
DNAJC2
PSMC2
SLC26A5
RELN
ZC3HC1
ORC5
KLHDC10
LHFPL3
TMEM209
KMT2E
CPA2
SRPK2
CPA5
PUS7
RINT1
CPA1
CEP41
EFCAB10
ATXN7L1
MEST
SYPL1
COPG2
NAMPTP1
CCDC71L
PIK3CG
PRKAR2B
FBXO18
HBP1
COG5
DUS4L
BCAP29
SLC26A4
ANKRD16
CBLL1
SLC26A3
DLD
LAMB1
LAMB4
ERGIC2
LRRK2
TASOR2
GDI1
SLC2A13
ABCD2
KIF21A
CPNE8
ASB13
ALG10
TPRKB
GTSE1
CALML3
NET1
TRMU
CELSR1
GRAMD4
CERK
TBC1D22A
TUBAL3
UCN3
TAFA5
SLC35B4
LRGUK
EXOC4
BRD1
ZBED4
ALG12
CRELD2
PIM3
IL17REL
MLC1
MOV10L1
PANX2
TRABD
SELENOO
TUBGCP6
HDAC10
MAPK12
MAPK11
PLXNB2
ZNF800
GRM8
POT1
GPR37
ARL8BL
SPAM1
HYAL6
WASL
LMOD2
ASB15
NDUFA5
IQUB
ATP6AP1
SLC13A1
CADPS2
FEZF1
AASS
PTPRZ1
FAM3C
WNT16
CPED1
ING3
TSPAN12
KCND2
CHCHD3
ANKRD26
LSM8
CTTNBP2
CFTR
ASZ1
WNT2
ST7
CAPZA2
MET
CAV1
CAV2
TES
TFEC
MDFIC
FOXP2
PPP1R3A
GPR85
BMT2
TMEM168
LSMEM1
IFRD1
TYMP
ZNF277
LRRN3
DOCK4
PLXNA4
IMMP2L
DNAJB9
THAP5
AVPR2C
PNPLA8
NRCAM
CNTN1
PDZRN4
GXYLT1
YAF2
ZCRB1
PPHLN1
PRICKLE1
ADAMTS20
PUS7L
IRAK4
TWF1
TMEM117
NELL2
PRLL
DBX2
ANO6
ARID2
SCAF11
SLC38A1
SLC38A2
SLC38A4
AMIGO2
RPAP3
ATP23
LRIG3
SLC16A7
TAFA2
USP15
MON2
PPM1H
AVPR1A
TMEM5
SRGAP1
KICS2
RPL18A
XPOT
TBK1
RASSF3
GNS
TBC1D30
WIF1
LEMD3
MSRB3
HMGA2
TMBIM4
HELB
GRIP1
CAND1
DYRK2
INFG
IL26
IL22
MDM1
RAP1B
NUP107
SLC35E3
MDM2
CPM
PODXL
CPSF6
LYZ
YEATS4
FRS2
CCT2
CTSEAL
LRRC10
BEST3
RAB3IP
MYRFL
CNOT2
KCNMB4
PTPRB
MKLN1
PTPRR
TSPAN8
LGR5
ZFC3H1
TMEM19
RAB21
TBC1D15
TPH2
TRHDE
GOLGB1
KCNC2
CAPS2
GLIPR1L1
GLIPR1
GLIPR1L
KRR1
PHLDA1
NAP1L1
BBS10
OSBPL8
ZDHHC17
CSRP2
E2F7
NAV3
SYT1
K123
IL2RA
PAWR
PPP1R12A
RBM17
RPS16
OTOGL
PTPRQ
PFKFB3
MYF6
MYF5
ACSS3
PPFIA2
CCDC59
METTL25
TMTC2
HCLS1
PRKCQ
SLC6A15
TSPAN19
ALX1
NME6
RASSF9
NTS
MGAT4C
C12orf50
RLIG1
CEP290
TMTC3
KITLG
RABL2A
DUSP6
POC1B
ATP2B1
EPYC
KERA
LUM
DCN
ARSA
BTG1
PLEKHG7
EEA1
UBE2N
MRPL42
SOCS2
CRADD
PLXNC1
CEP83
TMCC3
SNAPC3
NDUFA12
NR2C1
FGD6
VEZT
METAP2
USP44
NTN4
SNRPF
AMDHD1
HAL
LTA4H
ELK3
CDK17
CFAP54
NEDD1
TMPO
SLC25A3
IKBIP
APAF1
ITIH5
ITIH2
BLTP3B
ACTR6
SCYL2
SLC17A8
NR1H4
GAS2L3
ANO4
KIN
SLC5A8
UTP20
ARL1
NUP205
ATP5C1
CNOT4
TAF3
STRA8
WDR91
TMEM140
PDE6H
ARHGDIB
ERP27
MGP
OC3
ART4
SMCO3
SHANK3
H2AC32
H2BC32
H3C33
H2AC39
H2BC37
H1-010
H1-01
H2BC35
APOLD1
DDX47
HEBP1
FAM234B
GSG1
EMP1
GRIN2B
ATF7IP
PLBD1
GUCY2C
IFT56
UBN2
FMC1
LUC7L2
GBE
POLDIP3
RRP7A
SERHL
SOCS1L
GATA3
TCF20
CYP2D6
NDUFA6
SMDT1
PHETA2
NAGA
WBP2NL
SEPTIN3
SMIM45
CENPM
TNFRSF13C
SREBF2
CCDC134
MEI1
XRCC6
DESI1
PMM1
CSDC2
POLR3H
ACO2
PHF5A
TOB2
TEF
ZC3H7B
RANGAP1
CHADL
L3MBTL2
EP300
RBX1
XPNPEP3
ST13P5
SLC25A17
MRTFA
SGSM3
ADSL
TNRC6B
FAM83F
GRAP2
CACNA1I
RPS19BP1
ATF4
MIEF1
MGAT3
TAB1
SYNGR1
RPL3
PDGFB
CBX7
NPTXR
DNAL4
SUN2
GTPBP1
JOSD1
TOMM22
CBY1
DMC1
DDX17
KDELR3
KCNJ4
CSNK1E
TMEM184B
MAFF
PLA2G6
BAIAP2L2
SLC16A8
PICK1
SOX10
POLR2F
C22orf23
MICALL1
EIF3L
ANKRD54
GALR3
GCAT
H-10
NOL12
LGALS1A
PDXP
SH3BP1
GGA1
LGALS2
CDC42EP1
CARD10
MFNG
ELFN2
RAC2
CYTH4
SSTR3
C1QTNF6
IL2RB
TMPRSS6
KCTD17
MPST
TST
NCF4
PVALB
IFT27
CACNG2
EIF3D
FOXRED2
TXN2
MYH9
RBFOX2
MB
RASD2
MCM5
HMOX1
TOM1
HMGXB4
ISX
LARGE1
SYN3
TIMP3
FBXO7
RTCB
ASCL4
PRDM4
PWP1
ABTB3
CRY1
MTERF2
TMEM263
RIC8B
RFX4
POLR3B
TCP11X2
CKAP4
NUAK1
C12orf75
APPL2
WASHC4
ALDH1L2
SLC41A2
CHST11
TXNRD1
NFYB
HCFC2
GLT8D2
TDG
C12orf73
HSP90B1
NT5DC3
STAB2
ASCL1
PAH
IGF1
PARPBP
PMCH
NUP37
WASHC3
DRAM1
GNPTAB
CHPT1
MYBPC1
SPIC
PARP12
TBXAS1
HIPK2
KIAA1549
ATP6V0A4
SVOPL
TRIM24
AKR1D1
KDM7A
SLC37A3
RAB19
MKRN4P
DENND2A
ADCK2
NDUFB2
BRAF
MRPS33
TMEM178B
AGK
DENND11
WEE2
SSBP1
CREB3L2
DGKI
PTN
CHRM2
MTPN
FAM180A
SLC13A4
C7orf73
SYT10
PKP2
YARS2
DNM1L
FGD4
BICD1
CELF2
AMN1
DENND5B
FAM60A
CAPRIN2
IPO8
TMTC1
DDX11
WASHC1
IQSEC3
SLC6A12
SLC6A13
KDM5A
CCDC77
B4GALNT3
NINJ2
WNK1
RAD52
ERC1
WNT5B
FBXL14
ADIPOR2
CACNA2D4
CHUNK-1
LRTM2
DCP1B
CACNA1C
IL17RA
HDHD5
TMEM121B
CECR1
CECR2
ATP6V1E1
BCL2L13
BID
MICAL3
PEX26
TUBA8B
TUBA8A
USP18
AKR1B1
AKR1E2
BPGM
CALD1
AKR1B10
RERG
PTPRO
EPS8
STRAP
DERA
SLC15A5
MGST1
LMO3
RERGL
PIK3C2G
PLCZ1
CAPZA3
PLEKHA5
AEBP2
PDE3A
SLCO1C1
SLCO1B3
SLCO1A2
IAPP
PYROXD1
RECQL
GOLT1B
USP6NL
BCAT1
SOX5
ETNK1
C2CD5
ST8SIA1
ECHDC3
C3AR1L
CMAS
PROSER2
ABCC9
KCNJ8
LDHB
GYS2
SPX
UPF2
IRAG2
DNAI7
ETFRF1
KRAS
RASSF8
BHLHE41
SSPN
ITPR2
DHTKD1
SEC61A2
INTS13
FGFR1OP2
TM7SF3
MED21
STK38L
NUDT5
ARNTL2
PPFIBP1
CDC123
A4GALT
ARFGAP3
PACSIN2
TTLL1
BIK
MCAT
TSPO
TTLL12
SCUBE1
CAMK1D
MPPED1
SULT4A1
PNPLA3
SAMM50
PARVB
PARVG
SHISAL1
PRR5
ARHGAP8
PHF21B
NUP50
KIAA0930
UPK3A
SMC1B
RIBC2
FBLN1
ATXN10
WNT7B
CCDC3
PPARA
CDPF1
PKDREJ
ZC3HAV1
ETV6
LRP6
MANSC1
BORCS5
DUSP16
OPTN
CREBL2
GPR19
CDKN1B
MCM10
PHYH
SEPHS1
MRPS35
MANSC4
KLHL42
PTHLH
BEND7
CCDC91
FAR2
RAD51AP1
FERRY3
PRPF18
FGF6
FGF23
CCND2
FRMD4A
NDUFA9
KCNA1
NTF3
VWF
CD9
PRMT8
PARP11
TEAD4
FOXM1
TULP3
ITFG2
FKBP4
NECAP1
FOXJ2
SLC2A14
NANOG
AICDA
MFAP5
RIMKLB
PHC1
M6PR
OVST
MAN1A2
CD86
CASR
CSTB
CSTA
CCDC58
FAM162A
KPNA1
FBXO40
TAPBPL
SCNN1A
VAMP1
MRPL51
NCAPD2
CNP1
GAPDH
IFFO1
NOP2
CHD4
LPAR5
ACRBP
ING4
ZNF384
PIANP
COPS7A
MLF2
LAG3
CD4
GPR162
P3H3
GNB3
CDCA3
USP5
TPI1
LRRC23
ENO2
ATN1
C12orf57
PTPN6
PHB2
EMG1
LPCAT3
C1S
C1R
CLSTN3
PEX5
EPHA1
ZYX
FAM131B
CLCN1
CASP2
RAP1GAP3
GSTK1
TAS2R40
TRPV6
EPHB6
FAM107B
PRSS2
PRSS3
YBX3
SYCE3
STYK1
HSD3B1
GABARAPL1
TMEM52B
HAO2
WARS2
TBX15
SPAG17
WDR3
GDAP2
FAM46C
DUSP12
ATP6V1A
NAA50
USF3
SIDT1
SPICE1
HSPA14
TRIM45
VTCN1
TNFRSF1A
METTL16
POLQ
SUV39H2
STXBP5L
DCLRE1C
MEIG1
GTF2E1
RABL3
HGD
NDUFB4
TMEM243
FSTL1
LRRC58
DMTF1
GPR156
GSK3B
CFAP91
COX17
POPDC2
PLA1A
ATP1A1
MAB21L3
SLC22A15
NHLH2
CASQ2
VANGL1
CHD1L
ELAPOR2
TMEM39A
B4GALT4
ARHGAP31
UPK1B
IGSF11
LSAMP
GRM3
GAP43
ZBTB20
DRD3
QTRT2
CCDC191
ZDHHC23
GRAMD1C
CLDND1
GPR15
APOV1
ILDR1
CFAP44
BOC
NEPRO
TAF13
GTPBP8
CD200R1B
CD200R1A
CCDC80
SLC35A5
ATG3
F5
SLC19A2
CCDC181
BLZF1
NME7
ATP1B1
DPT
XCL1
TBX19
SFT2D2
TIPRL
GPR161
CPOX
ST3GAL6
COL8A1
DCBLD2
TMEM30CP
CMSS1
FILIP1L
TBC1D23
NIT2
TOMM70
LNP1
TMEM45A
ADGRG7
TFG
ABI3BP
IMPG2
TXNL4B
TRMT10C
PCNP
ZBTB11
RPL24
CEP97
NXPE3
NFKBIZ
ZPLD1
ALCAM
CBLB
BBX
CD47
IFT57
HHLA2
MYH15
CIP2A
SH2D1B
TRAT1
HJURP
GUCA1C
SEMA3D
NECTIN3
PLCXD2
PHLDB2
ABHD10
TAGLN3
TMPRSS7
C1H3ORF52
CD200L
CD200
CGGBP1
ZNF654
C3orf38
EPHA3
PROS1
ARL13B
STX19
NSUN3
EPHA6
ARL6
SEMA3A
MINA
GABRR3
DCAF6
MPC2
MPZL1
RCSD1
CREG1
CD247
POU2F1
GPA33
STYXL2
MAEL
ILDR2
ZFP92
PTGFRN
IGSF3
ADPRH
CD88
TIMMDC1
POGLUT1
BCL9
ACP6
GJA8
GJA5
GPR89A
PDZK1
HTR1F
POU1F1
CHMP2B
VGLL3
CADM2
GBE1
ROBO1
SEMA3E
ROBO2
RBM11
HSPA13
SAMSN1
NRIP1
USP25
CXADR
C21orf91
CHODL
TMPRSS15
SLC24A5
MYEF2
CTXN2
ZNF592
SEC11A
NMB
DUOX2
SORD
SLC12A1
DUT
FBN1
SHC4
RBPMS2
SECISBP2L
COPS2
GALK2
FGF7
FAM227B
DTWD1
AFG2B
C10H15ORF48
SLC30A4
SQOR
BLOC1S6
ITGB1BP3
SPPL2A
TRPM7
OAZ2
USP8
GABPB1
HDC
ZNF609
GATM
PDE8A
FSD2
WHAMM
HOMER2
FAM103A1
TRIP4
BTBD1
TM6SF1
HDGFL3
BNC1
SH3GL3
ADAMTSL3
CSNK1G1
SAXO2
EFL1
MEX3B
TMC3
STARD5
CFAP161
TLNRD1
MESDC2
CEMIP
ABHD17C
ARNT2
PPIB
SNX22
SNX1
CTXND1
FAH
ZFAND6
PATL2
BCL2A1
MTHFS
B2M
TERB2
MINAR1
RPS17
CPEB1
PEX11A
PLIN1
KIF7
TICRR
RHCG
POLG
FANCI
RLBP1
ABHD2
MFGE8
HAPLN3
ACAN
AP3B2
DET1
MRPS11
MRPL46
NTRK3
NR2E3
MYO9A
AGBL1
KLHL25
AKAP13
SV2B
SLCO3A1
ST8SIA2
FAM174B
CHD2
RGMA
MCTP2
SENP8
GRAMD2
PKLR
PARP6
CELF6
HEXA
NR2F2
ARIH1
BBS4
ARRDC4
ADPGK
PGPEP1L
IGF1R
SYNM
LRRC28
MEF2A
LYSMD4
ADAMTS17
CERS3
LINS1
ASB7
ALDH1A3
LRRK1
CHSY1
NEO1
SELENOS
SNRPA1
PCSK6
PLEKHO2
ANKDD1A
SPG21
CLPX
PDCD7
UBAP1L
KBTBD13
RASL12
MTFMT
CILP
GNRHR
PARP16
IGDCC3
IGDCC4
DPP8
HACD3
VWA9
SLC24A1
DENND4A
RAB11A
MEGF11
DIS3L
TIPIN
MAP2K1
SNAPC5
RPL4
ZWILCH
SMAD6
SMAD3
AAGAB
IQCH
C15orf61
MAP2K5
SKOR1
PIAS1
CALML4
CLN6
FEM1B
ITGA11
CORO2B
NOX5
GLCE
PAQR5
KIF23
TLE3
UACA
MORF4L2
HCN4
ADAMTS7
FAM96A
SPG11
EIF3J
CTDSPL2
CASC4
FRMD5
WDR76
BLM
CTSH
RASGRF1
MESP1
TMED3
ANPEP
AP3S2
ZNF710
IDH2
SEMA4B
CIB1
GDPGP1
TTLL13
HDDC3
VPS33B
PRC1
UNC45A
MAN2A2
FES
FURIN
MFAP1
HYPK
SERINC4
SERF2
PDIA3
CKMT1B
PPIP5K1
MAP1A
TP53BP1
TUBGCP4
IQGAP1
REC114
NPTN
CD276
INSYN1
LOXL1
PPCDC
SCAMP5
RPP25
FAM219B
MPI
COX5A
SCAMP2
ULK3
CPLX3
CSK
CYP1A2
CYP1A1
EDC3
CLK3
ARID3B
ACTG1L
UBL7
SEMA7A
CYP11A1
STRA6
ISLR2
ISLR
STOML1
ZP3
COMMD4
NEIL1
MAN2C1
SIN3A
PTPN9
SNUPN
SNX33
CSPG4
LINGO1
HMG20A
PEAK1
TSPAN3
SCAPER
PSTPIP1
RCN2
ISL2
ETFA
TMEM266
NRG4
FBXO22
UBE2Q2
CHRNB4
CHRNA3
CHRNA5
PSMA4
IREB2
CRABP1
WDR61
DNAJA4
ACSBG1
IDH3A
CIB2
TBC1D2B
DAPK2
HERC1
FBXL22
USP3
CA12
RAB8B
RPS27L
LACTB
TPM1
TLN2
VPS13C
RORA
ICE2
ANXA2
FOXB1
BNIP2
GTF2A2
GCNT3
OTUD7A
KLF13
TRPM1
MTMR10
FAN1
MPHOSPH10
MCEE
APBA2
ENTREP2
TJP1
TARSL2
TM2D3
ADAL
LARP6
LRRC49
THSD4
MYO1E
CHRNA7
FAM81A
CCNB1
RNF111
SLTM
MINDY2
ADAM10
LIPC
AQP9
ALDH1A2
POLR2M
MYZAP
CGNL1
TCF12
ZNF280D
MNS1
TEX9
NEDD4
PRTG
PYGO1
DNAAF4
CCPG1
SHF
PIGB
RAB27A
PIGBOS1
RSL24D1
UNC13C
ALPK3
WDR72
ONECUT1
FAM214A
ARPP19
MYO5A
MYO5C
GNB5
BCL2L10
MAPK4
LEO1
TMOD3
TMOD2
LYSMD2
SCG3
AP4E1
TNFAIP8L3
CYP19A1
GLDN
DMXL2
SEMA6D
PEPD
PSKH1
CTRL
EXOC3L1
E2F4
ELMO3
TMEM208
MATCAP1
LCAT
PLA2G15
CHST8
RIPOR1
KCTD15
CTCF
LSM14A
SS18L2
GARRE1
GPI
WTIP
UBA2
CARMIL2
CIAO2B
RRAD
PDP2
CA7
NAE1
DYNC1LI2
CMTM4
CMTM3
CKLF
TK2
AARS1
SMPD3
BEAN1
CDH5
EXOSC6
ZDHHC1
TPPP3
CDH11
PLEKHG4
CDH8
SLC9A5
FHOD1
HSD11B2
ATP6V0D1
SETD6
ADAMTS18
CNOT1
NUDT7
VAT1L
CLEC3A
WWOX
SLC38A7
GOT2
MAF
CALB2
CMTR2
DYNLRB2
HYDIN
CDYL2
CMC2
CENPN
ATMIN
PPP1R3E
GCSH
PKD1L2
BCO1
CMIP
PLCG2
SDR42E1
HSD17B2
NAT
PNAT3
PNAT10
MPHOSPH6
CDH13
VAC14
PRMT7
MLYCD
HSBP1
KCNG4
WFDC1
ATP2C2
MTSS2
TLDC1
COTL1
KLHL36
USP10
CRISPLD2
SF3B3
HNF4beta
ZDHHC7
COG4
FCSK
FOXL1
FOXC2
MTHFSD
FOXF1
ST3GAL2
PDPR
IRF8
COX4I1
EMC8
GSE1
KIAA0513
GLG1
FBXO31
MAP1LC3B
ZCCHC14
JPH3
KLHDC4
SLC7A5
CA5B
BANP
ZNF469
ZFPM1
RFWD3
CIDEC
ZC3H18
IL17C
CYBA
MVD
RNF166
CTU2
PIEZO1
SLC7A6OS
CDT1
APRT
GALNS
TRAPPC2L
CBFA2T3
MLKL
ACSF3
CDH15
SLC22A31
ANKRD11
FA2H
SPG7
RPL13
CPNE7
DPEP1
WDR59
CHMP1A
CDK10
VPS9D1
ZNF276
FANCA
SPIRE2
TCF25
TUBB3
MC1R
DEF8
DBNDD1
GAS8
URAH
CDH3
CDH1
TANGO6
HAS3
CHTF8
UTP4
SNTB2
VPS4A
PDF
COG8
NIP7
TMED6
TERF2
CYB5B
NFAT5
NQO1
NOB1
WWP2
PSMD7
ZNRF1
CTRB1
LDHD
ZFHX3
SLC7A6
BCAR1
CFDP1
DHX38
DHODH
IST1
ZNF821
ATXN1L
AP1G1
PHLPP2
MARVELD3
KARS1
TERF2IP
ADAT1
GABARAPL2
TMEM231
CHST6
SLC12A3
NUP93
MT4
MT3
BBS2
OGFOD1
NUDT21
AMFR
TLR21
GNAO1
CBFB
PHAF1
B3GNT9
TRADD
FBXL8
HSF4
DNAAF1
NDRG4
HSDL1
MBTPS1
SLC38A8
NECAB2
GINS3
ESRP2
NFATC3
CFAP263
DUS2
DDX28
GALR1L
DPEP2
SLC12A4
CSNK2A2
SLC6A2
LPCAT2
CFAP20
MMP2
MMP15
ZNF319
USB1
IRX6
KIFC3
IRX5
KATNB1
IRX3
DRC7
UMOD
FTO
ADGRG3
ADGRG1
ADGRG5
CCDC102A
RPGRIP1L
DOK4
POLR2C
AKTIP
RBL2
CHD9
COQ9
CIAPIN1
TOX3
GFOD2
ENKD1
CETP
PARD6A
HERPUD1
NLRC5
SALL1
CPNE2
CYLD
SNX20
NKD1
FAM192A
BRD7
ADCY7
RSPRY1
TENT4B
HEATR3
CNEP1R1
ZNF423
ARL2BP
CBLN1
ARL2BPL
N4BP1
SIAH1
LONP2
PHKB
PLLP
CX3CL1
CCL17
ITFG1
NETO2
DNAJA2
CDCA9
GPT2
RANBP10
C16orf87
MYLK3
ORC6
VPS35
SHCBP1
UQCRFS1
VSTM2B
POP4
PLEKHF1
C19orf12
CCNE1
URI1
CENPT
NUTF2
ZNF536
EDC4
TSHZ3
ZNF507
DPY19L3
PDCD5
ANKRD27
RGS9BP
NUDT19
SLC7A9
CEP89
FAAP24
RHPN2
GPATCH1
LRP3
SLC7A10
CEBPA
CEBPG
PLXNA1
SFMBT1
TXNRD3
CHST13
SLC41A3
KLF15
CFAP100
UROC1
CHCHD4
TMEM43
XPC
LSM3
SLC6A6
RRP9
GRIP2
CCDC174
PLXNB3
SETD5
LHFPL4
MTMR14
CPNE9
BRPF1
OGG1
CAMK1
TADA3
ARPC4
IL17RC
RPUSD3
JAGN1
CRELD1
CCDC36
KLHDC8B
CCDC71
LAMB2
USP19
QARS
QRICH1
IMPDH2
NDUFAF3
DALRD3
P4HTM
ARIH2
SLC25A20
PRKAR2A
HTD2
PXK
PDHB
KCTD6
ACOX2
FAM107A
FAM3D
CFAP20DC
RFT1
FHIT
PTPRG
PRKCD
CEP15
FEZF2
SYP
SNTN
PFKFB4
THOC7
ATXN7
PSMD6
PRICKLE2
ADAMTS9
MAGI1
HYAL1
HYAL2
TUSC2
RASSF1
ZMYND10
CYB561D2
SLC25A26
TMEM115
CACNA2D2
LRIG1
KBTBD8
SUCLG2
TAFA1
TAFA4
EOGT
TMF1
UBA3
ARL6IP5
LMOD3
FRMD4B
MITF
MDFIC2
FOXP1
EIF4E3
GPR27
PROK2
RYBP
SHQ1
GXYLT2
PPP4R2
PDZRN3
CNTN3
CHL1
C3orf18
HEMK1
CNTN6
CNTN4
IL5RA
TRNT1
CRBN
LRRN1
CISH
SUMF1
ITPR1
MAPKAPK3
BHLHE40
ARL8B
EDEM1
GRM7
LMCD1
CAV3
OXTR
RAD18
DOCK3
SRGAP3
THUMPD3
IRAK2
GHRL
SEC13
CAND2
RPL32
MBD4
IFT122
RHO
PLXND1
TMCC1
TRH
RBSN
MRPS25
NR2C2
FGD5
DUSP7
MANF
RBM15B
DCAF1
GBP
RNF123
GMPPB
AMIGO3
IP6K1
FAM212A
AMT
NICN1
DAG1
MST1
APEH
BSN
TRAIP
MST1R
MON1A
RBM6
RAD54L2
FANCD2
USP4
EMC3
GPX1
RHOA
TEX264
GRM2
ALAS1
TWF2
PPM1M
WDR82
GLYCTK
DNAH1
BAP1
SEMA3G
ACY1
ABHD14A
PCBP4
PARP3
RBM10
SEMA3F
GNAT1
GNAI2
SLC38A3
SEMA3B
OASL
HYAL3
NAA80
SHISA5
ATRIP
IPPK
ECM2
ASPN
OMD
OGN
CENPP
NOL8
IARS1
SLC6A11
SLC6A1
HRH1
ATG7
VGLL4
TAMM41
SYN2
TIMP4
PPARG
TSEN2
MKRN2OS
MKRN2
RAF1
CNBP
ISY1
RAB43
GP9
CFAP92
ACAD9
IQSEC1
RPL29
TNNC1
NISCH
NUP210
HDAC11
FBLN2
STAB1
WNT7A
PTPDC1
BARX1
PHF2
FAM120A
NT5DC2
WNK2
NINJ1
SMIM4
SUSD3
FGD3
PBRM1
BICD2
TKT
DCP1A
CACNA1D
CHDH
ACTR8
SELENOK
GNL3
GLT8D1
CACNA2D3
SPCS1
NEK4
LRTM1
ITIH3
WNT5A
ERC2
MUSTN1
STIMATE
CCDC66
TASOR
ARHGEF3
IL17RD
HESX1
APPL1
ASB14
DNAH12
ARF4
PDE12
DENND6A
SLMAP
FLNB
ABHD6
DNASE1L3
IP6K2
NCKIPSD
CELSR3
SLC26A6
UQCRC1
COPG1
H1-10
HMCES
RAB7A
RPN1
GATA2
EEFSEC
RUVBL1
SEC61A1
KBTBD12
MGLL
ABTB1
MCM2
TPRA1
FAF2
CLTB
NOP16
[truncated: 7,482 more rows]

## Sheet: ROH-Leghorn
Gene
AASDH
ABR
ADAMTS14
ADORA2B
ADPGK
ADPRM
AIFM2
ALPK1
ANAPC16
ANGPTL7
ANK2
AP1AR
AP1B1
AP3B2
AP3M2
APBB2
ARAP3
ARHGAP44
ARIH1
ARPP21
ARSJ
ASCC1
ASCC2
ASPA
ATP2B4
ATP6V1A
AVPR1B
B2M
BBS4
BFSP2
BHLHA9
BLMH
BMPER
BMPR1B
BRWD3
BTG2
BYSL
C12orf49
C1orf116
C1orf232
C4BPG
C4BPM
C4BPS
CABP7
CAMK2D
CAPRIN2
CASP6
CASTOR1
CCDC157
CCK
CCND3
CCR2
CCR5
CCR8L
CCR9
CD276
CD34
CDCP1
CDH23
CDK18
CDV3
CELF6
CENPS
CFI
CHIA
CHST3
CIAO1
CILP
CLCN5
CLDN10
CLEC3B
CLIC5
CLPX
CLSTN1
CNTN2
COL13A1
CPD
CPEB1
CPLANE2
CTNNA1
CTNNB1
CTNNBIP1
CTNS
CTSE
DDIT4
DELE1
DENND4A
DFFA
DIS3L
DNAH9
DNAJB12
DNAJC18
DNAJC3
DNAJC8
DOCK2
DPP8
DSTYK
DTX1
DUSP12
DYRK3
DZIP1
ECSCR
EGF
EIF2D
EIF4E3
EIF4EBP2
ELAC2
ELK4
ELOVL6
EMC6
EMID1
ENPEP
ENPP4
EPHA2
EWSR1
EXOSC10
EXOSC7
FAM110D
FAM241A
FAM46C
FAM60A
FBLIM1
FBXO21
FBXO42
FBXW8
FCHSD1
FLRT3
FMOD
FOXD3
FOXI1
FOXP1
FRS3
FYCO1
GABRA3
GABRE
GABRQ
GAR1
GDAP2
GJA9
GOSR1
GPR27
GRAMD2
HACD3
HASPIN
HCN4
HDAC3
HEXA
HK1
HMGN5
HNRNPR
HORMAD2
HS6ST3
HSPB7
IGDCC3
IGDCC4
IKBKB
IKBKE
IL10
IL19
INSYN2B
IPMK
IPO8
KAT6A
KBTBD13
KCNIP1
KCNMB1
KIAA1143
KIF15
KIF1B
KLHDC8A
KSR2
LARP7
LARS2
LCP2
LHX5
LIF
LIMD1
LONRF1
LRIT3
LRRC20
LRRN2
LRRTM2
LZIC
LZTFL1
MACROH2A2
MAP2K1
MAP2K4
MAPKAPK2
MASP2
MATR3
MCU
MCUB
MDFIC2
MDM4
MED13L
MED20
MEGF11
METTL16
MFSD4A
MICU1
MIR30A
MIR365B
MTFMT
MTMR3
MTOR
MTTPL
MYCBP
MYH10
MYO9A
MYOCD
MZB1
NAA50
NCOR1
NDEL1
NEFH
NEO1
NEUROG2
NEUROG3
NF2
NFASC
NIPSNAP1
NOS1
NPFFR1
NPSR1
NPTN
NR2E3
NSRP1
NSUN7
NTN1
NUAK2
NUCKS1
NUDT13
OIP5-AS1
OIT3
OPTC
P2RX5
P4HA1
PAFAH2
PAICS
PAIP2B
PALD1
PAQR7
PARP16
PARP6
PATL2
PCBD1
PCDH1
PCDH12
PCDHGC5
PDCD7
PDIK1L
PDLIM5
PEX14
PFKFB2
PGC
PGD
PIGL
PIGR
PIK3R5
PIK3R6
PIRT
PITX2
PKLR
PLA2G12A
PLA2G12B
PLAT
PLBD2
PLEKHM2
PM20D1
POLB
PPA1
PPAT
PPIB
PRELP
PROK2
PSAP
PTAFR
RAB11A
RAB7B
RAB7L1
RAP1GDS1
RASAL1
RASL12
RASSF5
RBBP5
RBM19
RBP7
REC114
RELL2
RFC5
RNaseP_nuc
RNF222
RNFT2
RPL4
RPS17
RRAGC
RRH
RUNX2
SACM1L
SCARNA10
SCARNA14
SCARNA16
SCARNA2
SCARNA3
SCARNA7
SCO1
SDSL
SENP8
SGPL1
SH3BGRL
SHISA6
SHPK
SIDT1
SIL1
SLC23A1
SLC24A1
SLC25A34
SLC26A9
SLC29A3
SLC30A2
SLC41A1
SLC45A3
SLC6A20
SLC6A4
SLC8B1
SLITRK4
SMAD6
SNAPC5
SNORA23
SNORA28
SNORA50C
SNORA51
SNORA62
SNORA63
SNORA65
SNORA71
SNORA72
SNORA73
SNORD100
SNORD101
SNORD102
SNORD104
SNORD125
SNORD127
SNORD14
SNORD16
SNORD18
SNORD24
SNORD36
SNORD42
SNORD4A
SNORD54
SNORD57
SNORD71
SNORD73
SNORD90
SNRNP200
SNRPD1
SNX1
SNX22
SOCS2
SOX3
SPAG17
SPATA22
SPDL1
SPECC1
SPEN
SPG21
SPICE1
SPOCK2
SRM
SST7
STAC
STMN1
STX8
SUDS3
TACR2
TAF8
TAOK3
TARDBP
TAX1BP3
TBX3
TBX5
TEKT3
TENT5D
TERB2
TESC
TGM4
THOC5
TIFA
TIMM22
TIPIN
TMCC2
TMEM108
TMEM127
TMEM158
TMEM220
TMEM42
TMEM81
TMEM82
TMIGD1
TNFRSF1A
TOMM6
TOPBP1
TPCN1
TRAIL-LIKE
TRAK1
TRARG1
TRIM45
TRIM63
TRPV1
TRPV2
TRPV3
TSPAN15
TSPAN5
TTC19
TVP23B
TYSND1
U12
U2
U4
U5
U7
UBAP1L
UBE4B
UCHL1
UGGT2
ULK4
UNC5B
UNC5C
UQCR10
USF3
USP43
USP49
Vault
VTCN1
VWA9
WDR3
WSB2
XCR1
Y_RNA
YOD1
ZBTB17
ZDHHC3
ZMAT5
ZSWIM7
ZWILCH

## Sheet: ROH-Local
Gene
AFF2
AMY1A
ANO3
ANO5
BBOX1
CCDC34
CDC14A
COL11A1
DPH5
EXTL2
FANCF
FIBIN
HMCN1
IVNS1ABP
NELL1
ODR4
OLFM3
PDC
PLA2G4A
PTGS2
RNPC3
S1PR1
SLC17A6
SLC30A7
SLC5A12
SVIP
SWT1
TPR
TRMT1L
BDNF
BLVRA
EGFR
HECW1
KIF18A
LANCL2
LGR4
LIN7C
METTL15
PRMT3
SEC61G
SLC6A5
STK17A
TPK1
VOPP1
AGL
C7orf25
DBT
FRRS1
LRRC39
MFSD14A
MRPL32
PALMD
PLPPR4
PLPPR5
PSMA2
RTCA
SASS6
SLC35A3
SNX7
TRMT13
ADARB1
C21orf58
C22orf39
CAVIN2
CDC45
CLDN5
CLTCL1
COMT
DIP2A
DLG5
DPYD
GLI3
GLS2
GNB1L
GP1BB
HIC2
HIRA
ITGB2
KCNMA1
KMO
LSS
MAPK3
MCM3AP
MRPL40
MYO1B
NABP1
NDUFA9
NOVA1
PCNT
PI4KA
POFUT2
PPIL2
PPM1F
S100B
SDF2L1
SEPTIN2L
SEPTIN5
SERPIND1
SLC25A1
SLITRK1
SNAP29
STAT1
STAT4
STXBP6
TBX1
TMEFF2
TOP3B
TXNRD2
UBE2L3
UFD1
YDJC
YPEL1
ACTC1
ADGRG6
ADIPOQ
AGMO
AGR2
AGR3
AGXT
AHR1A
AHR1B
AHR2
ALX1
ANGPTL5
ANKFY1
ANKLE2
ANKMY2
ANKRD28
AQR
ARAP2
ARG2
ARHGAP42
ARL4A
ARMC10
ARMC3
ARVCF
ATF6
ATG3
ATG7
ATP1B1
ATP2A3
ATP6V1D
BAZ1A
BLZF1
BMI1
BOK
BRINP3
BTD
BZW2
C11orf70
C11orf74
C4orf19
CAB39
CACNA2D1
CACNB2
CALM1
CAMKK1
CCDC146
CCDC181
CCDC80
CCND2
CD200R1A
CD200R1B
CDK6
CEP126
CEP170
CFL2
CHFR
CHID1
CHMP2B
CHRM3
CIP2A
CITED2
CLIP2
CNBP
CNTN5
COL18A1
COL6A1
COL6A2
COLQ
COMMD3
COPB2
COPS9
CREB5
CRIP1
CRPPA
CYB5D2
CYP46A1
DAZL
DDR2
DGCR8
DGKB
DGKG
DMTF1
DNAJC1
DNAJC2
DOCK4
DOK6
DPH3P1
DRD3
EBAG9
EFCAB11
EIF2S1
EIF4H
EML5
ENY2
ETV1
ETV5
EVX1
EXO1
F5
FAM185A
FARP2
FAT3
FBRSL1
FBXL13
FGL2
FKBP14
FOXG1
FOXL2
FOXN3
FTCD
GALNT11
GALNT15
GATSL2
GBE1
GJD2
GNAI1
GOLGA3
GP9
GPR55
GSAP
GTF2I
GTF2IRD1
GTPBP8
GUCA1C
HACL1
HDLBP
HES6
HHAT
HIBADH
HIVEP2
HJURP
HOXA1
HOXA10
HOXA11
HOXA13
HOXA2
HOXA3
HOXA4
HOXA5
HOXA6
HOXA7
HOXA9
HRH1
HSD17B7
IARS1
ISY1
ITM2C
JAZF1
KCNA4
KCNH1
KCNK10
KCNK13
KCNV1
KMT2C
LAT2
LEUTX
LRRC17
LRRC4C
MAB21L4
MAGI2
MALRD1
MAP1LC3C
MEOX2
METTL21C
MKRN2
MKRN2OS
MLLT10
MPP5
MRPS22
MTA1
MYBBP1A
NAPEPLD
NAV2
NCF1C
NDUFA10
NEBL
NEDD9
NEPRO
NKIRAS1
NMBR
NME7
NMNAT3
NR1D2
NRDE2
NUDCD1
NWD2
OLFML2B
OPN3
OTOS
OXNAD1
P2RX1
PASK
PCLO
PER2
PGAM5
PGM2
PGR
PHTF2
PIGH
PIGM
PIK3CB
PIP4K2A
PLCL2
PLD5
PLEK2
PLEKHA8
PLEKHH1
PLXDC2
PMPCB
POLR3A
POU1F1
PPARG
PPP1R7
PRKAG2
PRKD1
PRR5L
PSMC1
PSMC2
PTF1A
PTPN12
PTPN21
RAB43
RAF1
RAG1
RAG2
RANBP1
RBP1
RBP2
RCC1L
RCOR3
RDH11
RELL1
RELN
RFC2
RFTN1
RGS7
RPL15
RPS6KA5
RSBN1L
RTTN
SCIN
SCRN1
SEMA3A
SEMA3D
SEMA3E
SEPTIN2
SERTAD4
SH2D1B
SKAP2
SKIDA1
SLC19A1
SLC19A2
SLC25A24
SLC26A5
SLC35A5
SLC6A1
SLC6A11
SLC6A15
SMIM13
SNED1
SNX13
SNX32
SOCS6
SOSTDC1
SPAG6
SPATA7
SPNS2
SPNS3
ST6GAL1
STK25
SUMO3
SYBU
SYN2
SYT14
TAF13
TAMM41
TANGO2
TAX1BP1
TBC1D1
TBC1D15
TDP1
TEDC1
TEX30
THRB
TIMP4
TMEM121
TMEM229B
TMEM47
TMEM60
TMEM74
TMTC2
TPH2
TPP2
TRAF5
TRAF6
TRAT1
TRHR
TRIL
TRMT2A
TRPC6
TRPM2
TSEN2
TSPAN13
TSPAN19
TSPEAR
TTC7B
TTC8
TXLNB
UAP1
UBE2E1
UBE2G1
UBE2G2
UHMK1
VGLL3
VGLL4
VTA1
VTI1B
WDR64
WIPF3
ZBTB20
ZC3H14
ZDHHC8
ZFYVE26
ZNF770
ZZEF1

## Sheet: venn
Heat stress	Tajima's D	ROH-Local	Heat stress|Tajima's D	Heat stress|ROH-Local	Tajima's D|Fst	Tajima's D|PI	Tajima's D|ROH-Local	Heat stress|Tajima's D|Fst	Heat stress|Tajima's D|PI	Heat stress|Tajima's D|ROH-Local	Tajima's D|Fst|PI	Tajima's D|Fst|ROH-Local	Tajima's D|PI|ROH-Local	Heat stress|Tajima's D|Fst|PI	Heat stress|Tajima's D|PI|ROH-Local	Tajima's D|Fst|PI|ROH-Local	Heat stress|Tajima's D|Fst|PI|ROH-Local	ROH-Leghorn	Tajima's D|ROH-Leghorn	Tajima's D|PI|ROH-Leghorn	Tajima's D|Fst|ROH-Leghorn	Tajima's D|Fst|PI|ROH-Leghorn	Heat stress|ROH-Leghorn	Heat stress|Tajima's D|ROH-Leghorn	Heat stress|Tajima's D|Fst|PI|ROH-Leghorn
AP3S1	ARF5	AMY1A	SPR	PIK3CB	GRAMD4	DHRS4	PCLO	ITGA8	ATRX	PRKAG2	SRPK2	CCND2	TSPAN19	CUBN	SEMA3A	SLC6A15	TMTC2	CLDN10	FAM60A	RAB11A	USF3	SOCS2	DNAJC3	PLEKHM2	NAA50
MGST3	GCC1	CDC14A	NFRKB	NUDCD1	CFTR	EFCAB10	CACNA2D1	MRPL35	SLC7A11	HACL1	PUS7	NDUFA9	ZBTB20	AKR1D1		HJURP		CLIC5	CAPRIN2	MEGF11	PIGL	SPAG17		SLC24A1
VBP1	DENND6B	COL11A1	MFSD11		ASZ1	ATXN7L1	GNAI1	NTAN1	CBLL1	ZC3H14	RINT1	TRAT1	SLC6A11	KCNB1		GUCA1C		DZIP1	IPO8	DIS3L	TRPV2	WDR3		MTFMT
BAG3	PPP6R2	DPH5	JMJD6		WNT2	CCDC71L	MAGI2	BRAT1	IDH2	TAX1BP1	COG5	CACNB2	SLC6A1	HEPH		PLXDC2		ENPP4	SIDT1	TIPIN	P2RX5	GDAP2		PAFAH2
C8B	SBF1	EXTL2	PACSIN1		ST7	PIK3CG	PHTF2		UGT8	NEBL	DUS4L	HECW1	SCIN	NECAP1		MALRD1		FOXD3	SPICE1	MAP2K1	HASPIN	FAM46C		NEO1
FAP	HGF	HMCN1	ZFAND2A		CAV2	SLC26A3	TMEM60		NIPAL3	ATP2A3	BCAP29	KCNK13	ARL4A	HMGCL		SMIM13		HS6ST3	TRIM45	SNAPC5	EMC6	DUSP12		MTOR
LOXL4	ADM2	IVNS1ABP	HKDC1		MGAT4C	CPED1	RSBN1L		INHBA	SPATA7	SLC26A4	PSMC1	ETV1	PODXL		HIVEP2		IPMK	VTCN1	RPL4	TAX1BP3	ATP6V1A		AP3B2
PRKAA1	LMF2	ODR4	KCNJ2		C12orf50	ING3	PTPN12		MACC1	SPAG6	TES	NRDE2	DGKB	HSF3		C4orf19		MIR30A	TNFRSF1A	ZWILCH	CTNS	FOXI1		AP1B1
ABCA1	MIOX	OLFM3	SEMA3G		RLIG1	TSPAN12	GSAP		SELENOK	ARVCF	TFEC	CALM1	WIPF3	NCAPG		NWD2		MIR365B	METTL16	RBM19	SHPK	DOCK2		HSPB7
SEPTIN10	SCO2	PDC	IPPK		CEP290	KCND2	CCDC146		HSPB2	DNAJC1	SLC16A7		GLI3	PTGES3L		TTC7B		OIP5-AS1	PPIB	LHX5	TRPV1	INSYN2B		DNAJC8
CLN5	IRF5	PLA2G4A	BTK		TMTC3	TAFA2	FGL2		HSF2	DNAJC2	MKLN1		BLVRA	VAC14		RPS6KA5		RNaseP_nuc	SNX22	TPCN1	TRPV3	SPDL1		DNAJC18
NEK3	SEMA3C	PTGS2	ACKR2		KITLG	TBK1	FAM185A		DNAJB6	MAPK3	PHLDA1		VOPP1	ST13P5				RUNX2	SNX1	ATP2B4	ASPA	NPSR1		DNAJB12
ZNF385B	TNPO3	RNPC3	SPTY2D1		DUSP6	RASSF3	FBXL13		CRYAB		NAP1L1		LANCL2					SCARNA10	PATL2		SPATA22	CAMK2D
CDKN2B	CD36	S1PR1	LSP1P1		IGF1	GNS	LRRC17		SLC27A1		BBS10		EGFR					SCARNA14	B2M		PLA2G12B	CDH23
RPP25L	GNAT3	SLC30A7	KIAA1841		PLCZ1	RPS16	ARMC10		PRNP		OSBPL8		SEC61G					SCARNA16	TERB2		OIT3	PSAP
ITGA6	SMO	SWT1	KCTD2		KIAA0930	OTOGL	NAPEPLD		TRAP1		SYT1		TPK1					SCARNA2	RPS17		MCU	CHST3
TSTA3	AHCYL2	TPR	HN1		UPK3A	PTPRQ	PMPCB				PAWR		NEDD9					SCARNA3	CPEB1			AIFM2
PUM3	STRIP2	TRMT1L	NAMPTP1		SMC1B	RASSF9	PSMC2				ACSS3		DOK6					SCARNA7	NR2E3			MACROH2A2
FAM213A	SMKR1	AGL	TUBB4B		RIBC2	PACSIN2	SLC26A5				PPFIA2		TRAF5					SNORA23	MYO9A
MFSD6	NRF1	DBT	SLC25A5		FGF6	TTLL1	RELN				CCDC59		RCOR3					SNORA28	SENP8
RPP40	UBE2H	FRRS1	CRIPT		FGF23	BIK	DOCK4				METTL25		KCNH1					SNORA50C	GRAMD2
NCALD	ZC3HC1	LRRC39	AREG		NTF3	MCAT	TBC1D15				NTS		CITED2					SNORA51	PKLR
ANKRD46	ORC5	MFSD14A	AMDHD1		VWF	TSPO	TPH2				POC1B		TXLNB					SNORA62	PARP6
FUBP1	KLHDC10	PALMD	WDR89		CD9	TTLL12	ALX1				ATP2B1		AFF2					SNORA63	CELF6
MFF	LHFPL3	PLPPR4	PPFIBP1		PRMT8	SCUBE1	DMTF1				UBE2N		LRRC4C					SNORA65	HEXA
GTF2B	TMEM209	PLPPR5	PHIP		PARP11	BORCS5	DRD3				MRPL42		PRMT3					SNORA71	ARIH1
NDUFB1	KMT2E	RTCA	SPECC1L		TEAD4	MANSC4	NEPRO				CRADD		SLC6A5					SNORA72	BBS4
ARHGEF7	CPA2	SASS6	GPRC5C		FOXM1	KLHL42	TAF13				EP300		NELL1					SNORA73	ADPGK
BEND5	CPA5	SLC35A3	PHLPP1		TULP3	SLC2A14	GTPBP8				RBX1		ANO5					SNORD100	SPG21
NFE2L2	CPA1	SNX7	DYNC1H1		ITFG2	NANOG	CD200R1B				XPNPEP3		SLC17A6					SNORD101	CLPX
NAA35	CEP41	TRMT13	XRCC6		TAS2R40	MAN1A2	CD200R1A				SLC25A17		FANCF					SNORD102	PDCD7
GLUL	MEST	ADARB1	SLC10A7		FSTL1	LAG3	CCDC80				MRTFA		SVIP					SNORD104	UBAP1L
LRRFIP1	SYPL1	C21orf58	C9ORF152		LRRC58	CD4	SLC35A5				SGSM3		ANO3					SNORD125	KBTBD13
OXSR1	PRKAR2B	CAVIN2	SMCR8		MPC2	GPR162	ATG3				ADSL		PRKD1					SNORD127	RASL12
COP1	FBXO18	DIP2A	MMGT1		MPZL1	CLDND1	F5				TNRC6B		CCDC34					SNORD14	CILP
DMD	HBP1	DPYD	TFAP4		RCSD1	GPR15	SLC19A2				LARGE1		SLC5A12					SNORD16	PARP16
ARHGAP39	ANKRD16	GLS2	SDCBP2		CREG1	EPHA6	CCDC181				SYT10		FIBIN					SNORD18	IGDCC3
UBXN7	DLD	ITGB2	PLPP2		CD247	ARL6	BLZF1				PTPRO		BBOX1					SNORD24	IGDCC4
NA	LAMB1	KMO	ZNF207		GPI	IGSF3	NME7				EPS8		LGR4					SNORD36	DPP8
LOC772158	LAMB4	LSS	C8G		WTIP	ADPRH	ATP1B1				PIK3C2G		LIN7C					SNORD42	HACD3
KIAA1468	ERGIC2	MCM3AP	KIRREL1		UBA2	ROBO2	CIP2A				ITPR2		BDNF					SNORD4A	VWA9
HSPB7L	LRRK2	MYO1B	VPS4B		ANKRD11	TMPRSS15	SH2D1B				FBLN1		KIF18A					SNORD54	DENND4A
LOC101749352	TASOR2	NABP1	POLR1B		SPG7	IGF1R	SEMA3D				LRP6		METTL15					SNORD57	SMAD6
LOC121107673	GDI1	PCNT	NACA		RPL13	SYNM	POU1F1				DUSP16		DLG5					SNORD71	HCN4
LOC112533354	SLC2A13	POFUT2	MRPS18A		CPNE7	ADAMTS17	CHMP2B				CREBL2							SNORD73	REC114
SERPINH1	ABCD2	S100B	ZNF330		DPEP1	CERS3	VGLL3				GPR19							SNORD90	NPTN
HEATR8L5	CPNE8	SLITRK1	NR2F6		CHMP1A	LINS1	GBE1				CDKN1B							SOX3	CD276
HRC8L	ASB13	STAT1	ENTPD2		CDK10	GNRHR	SEMA3E				MRPS35							U12	MDFIC2
MROH2BL23	ALG10	STAT4	NBEAL2		VPS9D1	MESP1	IARS1				PTHLH							U2	FOXP1
HSFX2	TPRKB	TMEFF2	KIF21A		ZNF276	TMED3	HRH1				CCDC91							U4	EIF4E3
LOC112530578	GTSE1	ADIPOQ	PPP2R5C		FANCA	ANPEP	ATG7				FAR2							U5	GPR27
LOC124417001	CALML3	AGXT	TLK2		SPIRE2	AP3S2	VGLL4				RAD51AP1							U7	PROK2
HSPE1	NET1	AHR1B	TMC7		TCF25	ZNF710	TAMM41				FERRY3							UGGT2	PCDHGC5
MROH6	TRMU	AHR2	CLK4		TUBB3	SEMA4B	SYN2				KCNA1							Vault	HDAC3
HSFY2	CELSR1	ANGPTL5	AOC1		MC1R	CIB1	TIMP4				FKBP4							Y_RNA	RELL2
MROH2B1	CERK	ARHGAP42	ENSA		DEF8	GDPGP1	PPARG				FOXJ2								FCHSD1
LOC121107829	TBC1D22A	ATF6	PDCD6IP		DBNDD1	TTLL13	TSEN2				P3H3								ARAP3
LOC112532808	TUBAL3	BOK	PHKA1		GAS8	HDDC3	MKRN2OS				GNB3								PCDH1
LOC112531199	UCN3	BRINP3	GLCCI1		URAH	VPS33B	MKRN2				CDCA3								DELE1
LOC107057534	TAFA5	C11orf70	KIAA0232		CDH3	PRC1	RAF1				USP5								PCDH12
LOC107050089	SLC35B4	CAB39	GNGT2		CDH1	PDIA3	CNBP				TPI1								ECSCR
LOC107049283	LRGUK	CEP126	NELFB		TANGO6	CKMT1B	ISY1				LRRC23								MZB1
MROH2BL3	EXOC4	CNTN5	NRK		SNTB2	PPIP5K1	RAB43				ENO2								SLC23A1
MROH2AL5	BRD1	COL18A1	NR3C1		VPS4A	MAP1A	GP9				ATN1								PAIP2B
HSFY1	ZBED4	COL6A1	STT3B		PDF	TJP1	TXNRD2				C12orf57								MATR3
HEATR7B2L1	ALG12	COL6A2	FAM103A1		COG8	TARSL2	COMT				PTPN6								SIL1
LOC121109301	CRELD2	COPB2	CFAP100		NIP7	TM2D3	SLC25A1				PHB2								CTNNA1
LOC121107832	PIM3	COPS9	TIMD4		TMED6	ADAL	SNAP29				EMG1								LRRTM2
LOC121107639	IL17REL	CRIP1	KCTD20		TERF2	LARP6	PI4KA				LPCAT3								KCNIP1
LOC121107132	MLC1	DDR2	ENO1		NUP210	LRRC49	CLTCL1				C1S								KCNMB1
LOC112531330	MOV10L1	DGKG	RPN1		HDAC11	THSD4	SERPIND1				C1R								LCP2
LOC107055553	PANX2	EBAG9	ACTB		FBLN2	MYO1E	TANGO2				CLSTN3								CCDC157
LOC107049118	TRABD	ENY2	SNRPA1		PDXDC1	CCNB1	DGCR8				PEX5								CASTOR1
HSPB11	SELENOO	ETV5	PLXNB3		RRN3	RNF111	TRMT2A				EPHA1								LIF
MROH2BL2	TUBGCP6	FARP2	OGFR		RSL1D1	SLTM	RANBP1				ZYX								HORMAD2
MROH2BL20	HDAC10	FAT3	TMEM132A		GSPT2	MINDY2	ZDHHC8				FAM131B								MTMR3
MROH2BL5	MAPK12	FOXL2	DTWD1		SNX29	ADAM10	PGAM5				CLCN1								ASCC2
MROH2BL13	MAPK11	FTCD	PARP12		FAM20C	LIPC	ANKLE2				EPHB6								UQCR10
MROH7L7	PLXNB2	GPR55	SH2D3C		CPPED1	ALDH1A2	GOLGA3				PRSS2								ZMAT5
MROH7L5	ZNF800	HDLBP	NOX1		SHISA9	POLR2M	CHFR				WARS2								CABP7
HSFX1	GRM8	HES6	ZBTB7A		ERCC4	ADAMTS18	FBRSL1				TBX15								NF2
HSFX4	POT1	HSD17B7	ELN		MRTFB	WWOX	HIC2				ATP1A1								NIPSNAP1
HSFX5	GPR37	ITM2C	DGLUCY		RIMBP2	DYNLRB2	UBE2L3				MAB21L3								THOC5
HSFX6	ARL8BL	KCNV1	NCAPH2		NCOR2	CDYL2	YDJC				SLC22A15								NEFH
HSFY3	SPAM1	MAB21L4	TTC13		RFLNA	CMIP	SDF2L1				NHLH2								EWSR1
HSFX3	HYAL6	METTL21C	HIPK2		PITPNM2	PLCG2	TOP3B				CASQ2								EMID1
LOC100857292	WASL	MRPS22	RPS24		MINDY3	SDR42E1	PPM1F				VANGL1								DTX1
LOC121109494	LMOD2	MTA1	EIF4E		NDUFA4	HSD17B2	YPEL1				CHD1L								RASAL1
LOC121108498	ASB15	NDUFA10	AGAP3		PHF14	NAT	PPIL2				TMEM39A								WSB2
LOC121108315	NDUFA5	NMNAT3	ASB12		KIF13A	PNAT3	HIRA				B4GALT4								KSR2
LOC121108314	IQUB	OLFML2B	DNM1		SIRT5	PNAT10	MRPL40				ARHGAP31								RFC5
LOC121108313	ATP6AP1	OTOS	PSEN1		NOL7	MPHOSPH6	C22orf39				UPK1B								NOS1
LOC121107697	SLC13A1	PASK	LYRM4		RANBP9	CDH13	UFD1				LSAMP								FBXO21
LOC121107643	CADPS2	PER2	KIAA0513		MCUR1	USP10	CDC45				CBLB								TESC
LOC121107623	FEZF1	PGR	K123		ELOVL2	CRISPLD2	CLDN5				CADM2								FBXW8
LOC121106489	AASS	PPP1R7	TRIM9		SYCP2L	BANP	SEPTIN2L				ROBO1								RNFT2
LOC112532821	PTPRZ1	RBP1	COX11		GCM2	ZNF469	SEPTIN5				CMTR2								C12orf49
LOC112532805	FAM3C	RBP2	HACE1		MAK	SLC7A6	GP1BB				HYDIN								MED13L
LOC112531281	WNT16	SEPTIN2	SYDE1		SPMIP7	BBS2	TBX1				WDR59								TBX3
LOC112531221	CHCHD3	SLC19A1	DOHH		IKZF1	OGFOD1	GNB1L				CYB5B								TBX5
LOC112531214	ANKRD26	SLC25A24	DNAAF5		GSS	NUDT21	GATSL2				NFAT5								SDSL
LOC112530643	LSM8	SNED1	GUCY2C		ACSS2	TLR21	RCC1L				NQO1								PLBD2
LOC112529939	CTTNBP2	ST6GAL1	HSPA4L		TGM3	NDRG4	NCF1C				NOB1								SLC8B1
LOC107057518	CAPZA2	STK25	AHSA2		TGM6	GINS3	GTF2I				WWP2								SUDS3
LOC107057129	MET	SUMO3	DNAJB1		EPB42	CFAP263	GTF2IRD1				PSMD7								TAOK3
LOC107056965	CAV1	SYBU	LYZ		CCNDBP1	CSNK2A2	CLIP2				ZNRF1								SCO1
LOC107056924	MDFIC	TEDC1	OVAL		ZNFX1	CFAP20	RFC2				CTRB1								ADPRM
LOC107055619	FOXP2	TEX30	IL6		PHACTR3	CYLD	LAT2				LDHD								TMEM220
LOC107049453	PPP1R3A	TMEM121	PTGES3		KCNG3	DOCK3	EIF4H				BCAR1								MAP2K4
LOC121112656	GPR85	TMEM47	CNOT1		NFKBIE	USP4	MYBBP1A				CFDP1								MYOCD
LOC121112104	BMT2	TMEM74	AP2A2		SLC35B2	EMC3	SPNS2				SLC12A3								ELAC2
LOC121109189	TMEM168	TPP2	CLASP2		KIF25	GPX1	SPNS3				NUP93								DNAH9
LOC121107833	LSMEM1	TRHR	RPTOR		AFDN	RHOA	UBE2G1				MT4								SHISA6
LOC121107134	IFRD1	TRPC6	PPP4R1		CCR6	TEX264	ANKFY1				AMFR								PIRT
MROH2BL27	TYMP	TRPM2	HTT		CEP43	GRM2	CYB5D2				GNAO1								RNF222
MROH7L2	ZNF277	TSPEAR	NCAPD3		RNASET2	WNT7A	ZZEF1				FTO								NDEL1
MROH5	LRRN3	UAP1	AP2B1		ADGB	CHDH	P2RX1				RPGRIP1L								MYH10
HEATR7B1	PLXNA4	UBE2G2	COPG2		MTRF1L	ACTR8	CAMKK1				AKTIP								PIK3R6
HEATR8L3	IMMP2L	UHMK1	USP19		MYB	CACNA2D3	PTF1A				RBL2								PIK3R5
HSF1L	THAP5		PPP4R4		HBS1L	ERC2	ARMC3				CHD9								NTN1
HSFX7	AVPR2C		CEP104		ALDH8A1	CCDC66	PIP4K2A				TOX3								STX8
HSFX8	PNPLA8		RSPH14		TMEM30A	TASOR	BMI1				SALL1								USP43
HSFX9	NRCAM		SHQ1		COX7A2	G3BP1	COMMD3				TSHZ3								ARHGAP44
HASFX10	CNTN1		PDS5A		CD109	SPARC	MLLT10				ZNF507								TVP23B
LOC121109497	PDZRN4		PIK3R4		MSH6	FAT2	SKIDA1				DPY19L3								TEKT3
LOC121108102	GXYLT1		AP1G1		FBXO11	CCDC69	CDK6				NMUR2								NSRP1
LOC121108066	YAF2		SCYL2		FOXN2	ANXA6	AGMO				SLIT3								SLC6A4
LOC121108064	ZCRB1		AP3D1		ROCK2	TNIP1	MEOX2				TTC1								BLMH
LOC121108060	PPHLN1		CAND1		E2F6	GPX3	CRPPA				ADRA1B								TMIGD1
LOC121107640	PRICKLE1		GCN1		GREB1	SMIM3	SOSTDC1				ABCA3								CPD
LOC121107632	ADAMTS20		NCAPG2		LPIN1	DCTN4	ANKMY2				JPT2								GOSR1
LOC121107631	PUS7L		COPB1		DDX1	RBM22	BZW2				CRAMP1								TRARG1
LOC121107617	IRAK4		PSME4		CBR4	SYNPO	TSPAN13				IFT140								ABR
LOC121107304	TWF1		CKAP5		OPHN1	NDST1	AGR2				TMEM204								BHLHA9
LOC121107137	TMEM117		CAND2		YIPF6	RPS14	AGR3				CCNF								TIMM22
LOC121106503	NELL2		KPNB1		STARD8	CD74	AHR1A				TTYH3								SPECC1
LOC107056943	PRLL		KPNA6		SYNPO2	TCOF1	SNX13				ADGRD1								ADORA2B
LOC107049810	DBX2		API5		CRMP1	ARSI	SKAP2				STX2								ZSWIM7
LOC124416954	ANO6		AP4B1		PTCD3	CAMK2A	HOXA1				RAN								TTC19
LOC121112458	ARID2		RSPRY1		IMMT	SLC6A7	HOXA2				YLEC17								NCOR1
LOC121109498	SCAF11		TLR15		REEP1	CDX1	HOXA3				YLEC12								TMEM108
LOC121109362	SLC38A1		FAM65B		KDM3A	PDGFRB	HOXA4				HELZ								BFSP2
LOC121109346	SLC38A2		KPNA7		CHMP3	PPP2R2B	HOXA5				CACNG1								CDV3
LOC121109318	SLC38A4		PIH1D2		RNF103	STK32A	HOXA6				CACNG4								TOPBP1
LOC121109299	AMIGO2		PAM16		RMND5A	DPYSL3	HOXA7				CACNG5								CCR5
LOC121109188	RPAP3		UBAC1		CD8A	JAKMIP2	HOXA9				PRKCA								CCR2
LOC121106661	ATP23		PSMD5		CCDC142	CDC23	HOXA10				GALNT17								CCR8L
LOC112532719	LRIG3		COPG1		AKAP6	GFRA3	HOXA11				AUTS2								XCR1
LOC112531496	USP15		DNAAF2		MBIP	CTBPL	HOXA13				SMG6								FYCO1
HEATR8L2	MON2		POU2F1		TSHR	KDM3B	EVX1				SRR								CCR9
LOC107052395	PPM1H		PMS2		CCDC88C	REEP2	HIBADH				POLDIP2								LZTFL1
LOC124416996	AVPR1A		UBQLN4		PPP4R3A	EGR1	JAZF1				TMEM199								SLC6A20
LOC124416964	TMEM5		TPO		TC2N	CYSTM1	CREB5				KIF12								SNRPD1
LOC124416962	SRGAP1		XBP1		FBLN5	PURA	TRIL				VTN								SACM1L
RIDA	KICS2		NMT2		TRIP11	NRG2	SCRN1				SARM1								LIMD1
HSPBAP1	RPL18A		NMT1		ATXN3	TENM2	FKBP14				SLC46A1								LARS2
LOC107050255	XPOT		DNAJA3		CPSF2	GABRB2	PLEKHA8				SLC13A2								TMEM158
LOC112530684	TBC1D30		HSBP1L1		PAPSS2	ATP10B	COLQ				FOXN1								CDCP1
CALB1	WIF1		HSPA8		MINPP1	IL12B	BTD				UNC119								CLEC3B
APOB	LEMD3		HSP90AA1		SGMS1	FBXO38	ANKRD28				NRP1								EXOSC7
PDS5B	MSRB3		HSPA2		ZCCHC24	MGRN1	GALNT15				EPC1								ZDHHC3
IPO11	HMGA2		HSBP1		PPIF	UBALD1	DPH3P1				KIF5B								TGM4
TDRD12	TMBIM4		HSPA14		ZMIZ1	CDIP1	OXNAD1				ARHGAP12								TMEM42
ARMC8	HELB		HSPA13			HMOX2	RFTN1				MPP7								KIF15
CLASP1	GRIP1		HSPB9			SLX4	DAZL				ODAD2								KIAA1143
NIPBL	DYRK2		HSPB1			LDAF1	PLCL2				ARL5B								CTNNB1
INTS4	INFG		HEATR5A			ZP2	UBE2E1				NSUN6								ULK4
FAM65A	IL26		HSF4			ANKS4B	NKIRAS1				TRDMT1								TRAK1
LOC427025	IL22		DNAJA2			CRYM	RPL15				RSU1								CCK
LOC421690	MDM1		HSPA9			UQCRC2	NR1D2				C1QL3								ARPP21
LOC121112127	RAP1B		DNAJA4			LFNG	THRB				PTER								STAC
LOC121106548	NUP107		HSPA5			SDK1	C7orf25				ABCB1								BMPER
IPO5	SLC35E3		HEATR5B			BMERB1	PSMA2				RUNDC3B								CLSTN1
SF3B1	MDM2		CARHSP1			MARF1	MRPL32				SLC25A40								CTNNBIP1
PPP4R1L	CPM		HEATR6			HAPSTR1	STK17A				ADAM22								LZIC
LOC107057545	CPSF6		HEATR3			USP7	GALNT11				SRI								RBP7
UBQLN1	YEATS4		HEATR1			MYO18B	KMT2C				STEAP4								UBE4B
LOC121112128	FRS2		HSPA4			SEZ6L	SOCS6				ZNF804B								KIF1B
SCYL1	CCT2		HSPB8			ASPHD2	RTTN				TAC1								PGD
ODF1	CTSEAL		HSF5			HPS4	HHAT				ASNS								CENPS
ATR	LRRC10		RELCH			SRRD	SERTAD4				C1GALT1								DFFA
MORC4	BEST3		DNAJC17			TFIP11	SYT14				COL28A1								PEX14
LOC121112103	RAB3IP		HSP90B1			TPST2	CEP170				THSD7A								TARDBP
LOC107049117	MYRFL		DNAJC22			CRYBA4	PLD5				TMEM106B								MASP2
CRH	CNOT2		DNAJC7			CRYBB1	MAP1LC3C				KCNH8								SST7
AP3B1	KCNMB4		DNAJC13			OZFL1	EXO1				TBX20								SRM
TNPO1	PTPRB		DNAJC24			ZNFY4	WDR64				PDE1C								EXOSC10
BTAF1	PTPRR		DNAJC11			MHCY2B2	OPN3				TARP								ANGPTL7
TMCO7	TSPAN8		DNAJC5			ZNFY2	PIGM				AMPH								SLC25A34
LOC101748457	LGR5		DNAJB14			ZNFY3	RGS7				VPS41								FBLIM1
PSMD1	ZFC3H1		DNAJB9			DAXX	CHRM3				POU6F2								TMEM82
SCYL3	TMEM19		DNAJC16			ZBTB22	ADGRG6				ADCY1								SPEN
SUGT1	RAB21		DNAJC30			RGL2	VTA1				IGFBP1								ZBTB17
ECPAS	TRHDE		AKT1			BG8	NMBR				IGFBP3								EPHA2
TNPO2	GOLGB1		TRPV4			BGV	TBC1D1				TNS3								CPLANE2
MORC1	KCNC2		VEGFA			KIFC1	PGM2				PRL								FBXO42
GAK	CAPS2		IL1B			BLEC3	RELL1				CDKAL1								KAT6A
LOC425431	GLIPR1L1		SRC			ZNFB3	ARAP2				E2F3								AP3M2
LOC121108448	GLIPR1		CDC37			TRIM7.2	CHID1				MBOAT1								PLAT
LOC121112659	GLIPR1L		AHSA1			ZNFB1	NAV2				ID4								IKBKB
LOC121112657	KRR1		PDAP1			IL4I1	PRR5L				RNF144B								POLB
LOC121112096	ZDHHC17					TRIM7.1	TRAF6				RNF182								TMEM127
LOC107049856	CSRP2					UAP1L1	RAG1				C2H6orf52								CIAO1
FKBPL	E2F7					DPP7	RAG2				PAK1IP1								SNRNP200
LOC107049599	NAV3					MAN1B1	C11orf74				GFOD1								PTAFR
LOC107049478	IL2RA					ZNF618	LEUTX				TBC1D7								HNRNPR
LOC101751321	PPP1R12A					POMT1	TMEM229B				PHACTR1								C1orf232
LOC101748870	RBM17					UCK1	PLEKHH1				ADTRP								FAM110D
Hspb3	PFKFB3					PRRT1B	PIGH				TMEM170B								PDIK1L
HSP90AB1	MYF6					RAPGEF1	ARG2				EEF1E1								TRIM63
JS82_RS07210	MYF5					PRF1	VTI1B				BLOC1S5								SLC30A2
LOC128089093	HCLS1					ANKMY1	RDH11				TXNDC5								STMN1
DNAJA1	PRKCQ					STRBP	ZFYVE26				DAP								GJA9
DNAJC9	NME6					CRB2	PLEK2				ANKRD33B								PAQR7
LOC128074942	RABL2A					DENND1A	EIF2S1				SEMA5A								MYCBP
HSPH1	EPYC					LHX2	ATP6V1D				VWC2								RRAGC
HSF2BP	KERA					CACNA1G	MPP5				ZPBP1								MDM4
LOC128081283	LUM					SPATA20	ZNF770				COBL								LRRN2
LOC128075824	DCN					DHRS7C	AQR				SPIRE1								NFASC
LOC128075806	ARSA					GSG1L2	ACTC1				PRELID3A								CNTN2
OG872_RS15795	BTG1					GLP2R	GJD2				AFG3L2								RBBP5
EL247_RS03950	PLEKHG7					GAS7	STXBP6				TUBB6								TMEM81
ABDZ49_RS06985	EEA1					RAP1GAP2	NOVA1				CIDEA								DSTYK
GLP24_RS13385	PLXNC1					WSCD1	FOXG1				PIEZO2								TMCC2
FDH36_gp229	CEP83					SLC13A5	SNX32				NDRG3								NUAK2
FDH36_gp226	TMCC3					MED31	CFL2				PHF20								KLHDC8A
hrcA	SNAPC3					KIAA0753	BAZ1A				RBM39								CDK18
HSPD1	NDUFA12					PITPNM3	KCNK10				ROMO1								MFSD4A
OG872_RS28240	NR2C1					FBXO39	PTPN21				NFS1								ELK4
OG872_RS06470	FGD6					TEKT1	EML5				RBM12								SLC45A3
DNAJC15	VEZT					SMTNL2	TTC8				CPNE1								NUCKS1
HSPB3	METAP2					PIGS	FOXN3				SALL4								RAB7L1
HSF1	USP44					PRR11	EFCAB11				ATP9A								SLC41A1
HSPA12A	NTN4					GDPD1	TDP1				NFATC2								PM20D1
OG872_RS06475	SNRPF					YPEL2	KCNA4				ERGIC3								SLC26A9
hslR	HAL					DHX40	CYP46A1				CEP250								RAB7B
KMC31_gp025	LTA4H					CLTC	POLR3A				GDF5								CTSE
KMC31_gp022	ELK3					PTRH2	KCNMA1				UQCC1								AVPR1B
LOC128084327	CDK17					MSI2					TOX2								IKBKE
LOC128072091	CFAP54					AKAP1					EDEM2								RASSF5
LOC128090679	NEDD1					NF1					TRPC4AP								EIF2D
LOC128090678	TMPO					EVI2A					PTPRT								DYRK3
LOC128090676	SLC25A3					OMG					SLC13A3								MAPKAPK2
LOC128090673	IKBIP					WSB1					SLC2A10								IL10
LOC128086149	APAF1					LYRM9					EYA2								IL19
LOC128086139	ITIH5					NLK					ZMYND8								PIGR
LOC128084565	ITIH2					TMEM97					NCOA3								C1orf116
LOC128079145	BLTP3B					IFT20					SULF2								YOD1
LOC128078760	ACTR6					TNFAIP1					PREX1								PFKFB2
LOC128078639	SLC17A8					SGSM2					ARFGEF2								C4BPS
LOC128076599	NR1H4					MNT					CSE1L								C4BPG
LOC128076579	GAS2L3					PAFAH1B1					STAU1								C4BPM
LOC128076569	ANO4					CLUH					PPP1R3D								CD34
LOC128076526	KIN					CCDC92B					FAM217B								PGC
LOC128076525	SLC5A8					AQP1					CDH4								FRS3
LOC128076524	UTP20					GHRHR					AAK1								TOMM6
LOC128076520	ARL1					PARD3					NFU1								USP49
LOC128076459	NUP205					MKX					GFPT1								MED20
LOC128076406	ATP5C1					DBF4					ANTXR1								BYSL
LOC128076192	CNOT4					CALCR					GKN1								CCND3
LOC128076191	TAF3					FERD3L					GKN2								TAF8
LOC128074946	STRA8					TWISTNB					TCEB3								CHIA
LOC128074198	WDR91					TMEM196					PITHD1								BTG2
LOC128073757	TMEM140					TBC1D5					LYPLA2								FMOD
LOC128073755	PDE6H					SATB1					GALE								PRELP
LOC128073751	ARHGDIB					EFHB					FUCA1								OPTC
LOC128072793	ERP27					RAB5A					CNR2								FLRT3
LOC128072700	MGP					PP2D1					PNRC2								GABRQ
LOC128072181	OC3					KAT2B					SRSF10								GABRA3
LOC128072180	ART4					CPNE4					LBFABP								GABRE
LOC128072179	SMCO3					AOAH					MYOM3								ARSJ
LOC128072178	SHANK3					ANLN					IL22RA1								ANK2
LOC128072176	H2AC32					MATCAP2					IFNLR1								LARP7
LOC128072175	H2BC32					EEPD1					GRHL3								NEUROG2
LOC128072174	H3C33					SUGCT					FLI1								ALPK1
LOC128072173	H2AC39					CNTNAP2					KCNJ1								TIFA
LOC128071754	H2BC37					TPPP					KCNJ5								AP1AR
LOC128071752	H1-010					SLC9A3					ARHGAP32								FAM241A
LOC128071751	H1-01					LRRC14B					CD48								PITX2
LOC128071702	H2BC35					JARID2					SLAMF1								ENPEP
LOC128071701	APOLD1					DTNBP1					COPA								ELOVL6
LOC128071700	DDX47					BMP6					VANGL2								EGF
LOC128081856	HEBP1					LY86					NHLH1								LRIT3
LOC128073262	FAM234B					F13A1					NCSTN								RRH
DNAJB13	GSG1					PXDC1					S100A11								GAR1
DNAJB11	EMP1					CDH10					CRNN								CFI
DNAJB5	GRIN2B					BASP1					MAT2A								PLA2G12A
DNAJC21	ATF7IP					MTRR					KCTD12A								CASP6
DNAJC6	PLBD1					FASTKD3					EDBETA								MCUB
DNAJB4	IFT56					CFAP90					EDYM1								PDLIM5
DNAJC14	UBN2					ADCY2					DAD1								BMPR1B
DNAJC25	FMC1					FIGNL1					ASIC2								UNC5C
DNAJC27	LUC7L2					DDC					G6PC1								RAP1GDS1
DNAJC19	GBE					VSTM2A					AARSD1								TSPAN5
DNAJB8	POLDIP3					FHOD3					RUNDC1								LONRF1
DNAJC12	RRP7A					NOM1					RPL27								PAICS
DNAJC10	SERHL					MNX1					IFI35								PPAT
DNAJB2	SOCS1L					UBE3C					VAT1								AASDH
HIKESHI	GATA3					CCDC127					RND2								UCHL1
DNAJC5B	TCF20					SLC6A19					BRCA1								APBB2
DNAJC5G	CYP2D6					SLC6A18					NBR1								NSUN7
DNAJC28	NDUFA6					TERT					MPP2								SH3BGRL
LOC128091478	SMDT1					IRX2					JAG1								HMGN5
LOC128084539	PHETA2					ANKS6					SLX4IP								BRWD3
LOC128084517	NAGA					GABBR2					MKKS								TENT5D
LOC128083726	WBP2NL					ELP2					SNAP25								CLCN5
LOC128076571	SEPTIN3					TIMM21					SPATA17								TRAIL-LIKE
LOC128076470	SMIM45					FBXO15					HAAO								SLITRK4
LOC128076461	CENPM					NETO1					LRFN2								HK1
LOC128076405	TNFRSF13C					CBLN2					MOCS1								TACR2
LOC128073754	SREBF2					CCDC102B					DAAM2								TSPAN15
LOC128073260	CCDC134					TMX3					KIF6								NEUROG3
LOC128073233	MEI1					ERNI					KCNK16								COL13A1
LOC128072936	DESI1					DSEL					KCNK17								NUDT13
LOC128072935	PMM1					CDH7					KCNK5								P4HA1
LOC128072292	CSDC2					IMPA2					SAYSD1								MICU1
Trpv1	POLR3H					MPPE1					DNAH8								DDIT4
TP53	ACO2					GNAL					GLO1								ANAPC16
CASP8	PHF5A					PSMF1					BTBD9								ASCC1
ckap5	TOB2					RSPO4					ZFAND3								SPOCK2
Myd88	TEF					ANGPT4					MDGA1								TYSND1
APP	ZC3H7B					FAM110A					CCDC167								PPA1
HNRNPK	RANGAP1					SLC52A3					CMTR1								LRRC20
Pkp4	CHADL					SCRT2					RNF8								EIF4EBP2
Il18	L3MBTL2					SRXN1					AARS2								NPFFR1
DQL78_RS00715	FAM83F					TCF15					TCTE1								PALD1
DQL78_RS02900	GRAP2					CSNK2A1					TMEM151B								ADAMTS14
DQL78_RS05130	CACNA1I					TBC1D20					SMYD3								MTTPL
DQL78_RS11035	RPS19BP1					NRSN2					KIF26B								SGPL1
LI74_RS27840	ATF4					SOX12					EFCAB2								PCBD1
MRE11	MIEF1					REM1					RYR2								UNC5B
CXCL8	MGAT3					HM13					RPS6KA2								SLC29A3
lmo7b	TAB1					ID1					EPM2A
FC33_RS01605	SYNGR1					BCL2L1					FBXO30
ybeY	RPL3					KCNG1					SHPRH
GLP24_RS10245	PDGFB					MOCS3					GRM1
FC33_RS01835	CBX7					DPM1					CCDC170
Av05_00149	NPTXR					ADNP					ESR1
POLR2D	DNAL4					PARD6B					MYCT1
CRYAA	SUN2					RIPOR3					VIP
CLPB	GTPBP1					PTPN1					FBXO5
htpX	JOSD1					CEBPB					RGS17
FC33_RS05140	TOMM22					TMEM189					OPRM1
CDC37L1	CBY1					UBE2V1					SCAF8
TOMM34	DMC1					RNF114					TMEM181
CKV65_RS07100	DDX17					SNAI1					DYNLT1
CKV65_RS07095	KDELR3					SPATA2					SYTL3
CKV65_RS07090	KCNJ4					SLC9A8					EZR
grpE	CSNK1E					B4GALT5					TAGAP
htpG	TMEM184B					SRSF6					PDE7B
LOC128090652	MAFF					EPB41L1					AHI1
Ptk2	PLA2G6					AAR2					ARHGAP18
LOC128076619	BAIAP2L2					DLGAP4					LAMA2
Mapk1	SLC16A8					DDOST					PTPRK
Bmp4	PICK1					ADAM28					TPBG
Tlr9	SOX10					STC1					IBTK
PIK3R1	POLR2F					BIN3					FILIP1
APOBEC3G	C22orf23					SORBS3					COL12A1
NBN	MICALL1					DMTN					KCNQ5
Sirt1	EIF3L					NPM2					COL19A1
GHR	ANKRD54					XPO7					LMBRD1
NEWENTRY	GALR3					DOK2					ADGRB3
	GCAT					GFRA2					HMGCLL1
	H-10					BMP10					GFRAL
	NOL12					ARHGAP25					HCRTR2
	LGALS1A					CDS2					MYOM2
	PDXP					SLC23A2					DLGAP2
	SH3BP1					RASSF2					ERICH1
	GGA1					PROM2					NOL10
	LGALS2					DPYSL2					ATP6V1C2
	CDC42EP1					OSCP1					PDIA6
	CARD10					LSM10					KCNF1
	MFNG					STK40					NBAS
	ELFN2					EVA1B					PRKAG1
	RAC2					THRAP3					KMT2D
	CYTH4					MAP7D1					DHH
	SSTR3					TRAPPC3					LMBR1L
	C1QTNF6					COL8A2					TUBA1C
	IL2RB					TEKT2					TUBA1A
	TMPRSS6					ADPRHL2					PYM1
	KCTD17					AGO3					DGKA
	MPST					AGO1					PMEL
	TST					HPCAL4					CDK2
	NCF4					TRIT1					RAB5B
	PVALB					MYCL					SUOX
	IFT27					MFSD2A					IKZF4
	CACNG2					CAP1					RPS26
	EIF3D					PPT1					ERBB3
	FOXRED2					RPL11					PA2G4
	TXN2					RCAN3					MSN
	MYH9					C11orf52					VSIG4
	RBFOX2					CFAP68					GPR174
	MB					FDXACB1					ITM2A
	RASD2					ALG9					TBX22
	MCM5					CRABP2					CHMP1B
	HMOX1					ISG20L2					ENOX2
	TOM1					METTL25B					SLC25A14
	HMGXB4					MRPL24					RAB33A
	ISX					HDGF					MARS2
	SYN3					PRCC					AIFM1
	TIMP3					INSRR					BCORL1
	FBXO7					PEAR1					GPR83L
	RTCB					LRRC71					APELA
	ASCL4					BCAN					TMEM192
	PRDM4					NES					KLHL2
	PWP1					NTRK1					MSMO1
	ABTB3					ARHGEF11					CPE
	CRY1					ETV3					SPOCK3
	MTERF2					SLAMF8					EDA2R
	TMEM263					NKX2-3					GATB
	RIC8B					FAM83DL					PDE5A
	RFX4					EDCH3					FABP2
	POLR3B					EDMPN2					USP53
	TCP11X2					TUFT1					MYOZ2
	CKAP4					SNX27					NDST4
	NUAK1					MRPL9					PCDH7
	C12orf75					PFDN2					LCORL
	APPL2					RHBG					STK32B
	WASHC4					HAPLN2					EVC2
	ALDH1L2					MICAL1					EVC
	SLC41A2					SMPD2					PPP2R2C
	CHST11					TEAD3					LBX2
	TXNRD1					TULP1					PCGF1
	NFYB					FKBP5					AUP1
	HCFC2					CLPS					HTRA2
	GLT8D2					LHFPL5					LOXL3
	TDG					SRPK1					DOK1
	C12orf73					SLC26A8					M1AP
	NT5DC3					MAPK14					PLEKHA7
	STAB2					MAPK13					SHANK2
	ASCL1					BRPF3					NPAS3
	PAH					TBC1D22B					EGLN3
	PARPBP					PIM1					ESRRB
	PMCH					CACNA1S					NRXN3
	NUP37					KIF21B					DIO2
	WASHC3					ELF3					CEP128
	DRAM1					SYT6					UNC79
	GNPTAB					TRIM33					PRIMA1
	CHPT1					BCAS2					BMP4
	MYBPC1					DENND2C					PRKG1
	SPIC					AMPD1
	TBXAS1					NRAS
	KIAA1549					CSDE1
	ATP6V0A4					SIKE1
	SVOPL					SYCP1
	TRIM24					RPS10
	KDM7A					NUDT3
	SLC37A3					SMIM29
	RAB19					HMGA1
	MKRN4P					GRM4
	DENND2A					PKP1
	ADCK2					TMEM9
	NDUFB2					MGAT4F
	BRAF					TMEM183A
	MRPS33					CRHR1
	TMEM178B					ATP6V0A1
	AGK					NAGLU
	DENND11					HSD17B1
	WEE2					COASY
	SSBP1					PSMC3IP
	CREB3L2					TUBG1
	DGKI					PLEKHH3
	PTN					CCR10
	CHRM2					CNTNAP1
	MTPN					EZH1
	FAM180A					RAMP2
	SLC13A4					WNK4
	C7orf73					COA3
	PKP2					CNTD1
	YARS2					BECN1
	DNM1L					PSME3
	FGD4					ACTL9
	BICD1					LINGO3
	CELF2					TPM4
	AMN1					TINCR
	DENND5B					BTBD3
	TMTC1					BMP2
	DDX11					DZANK1
	WASHC1					KAT14
	IQSEC3					BIRC5
	SLC6A12					OVOL2
	SLC6A13					MGME1
	KDM5A					SNX5
	CCDC77					RRBP1
	B4GALNT3					MRPS5
	NINJ2					SLC8A1
	WNK1					GINS1
	RAD52					EIF4A3
	ERC1					ATL2
	WNT5B					BCL11A
	FBXL14					ESRRG
	ADIPOR2					PTPN14
	CACNA2D4					SMYD2
	CHUNK-1					VASH2
	LRTM2					FLVCR1
	DCP1B					TATDN3
	CACNA1C					NSL1
	IL17RA					BATF3
	HDHD5					ATF3
	TMEM121B					SLC30A1
	CECR1					RD3
	CECR2					EML4
	ATP6V1E1					ZFP36L2
	BCL2L13					THADA
	BID					PLEKHH2
	MICAL3					CAMKMT
	PEX26					TTC7A
	TUBA8B					TARBP1
	TUBA8A					COA6
	USP18					SLC35F3
	AKR1B1					MAP3K21
	AKR1E2					PCNX2
	BPGM					MACROD2
	CALD1					TULP4
	AKR1B10					HECA
	RERG					PKIB
	STRAP					SERINC1
	DERA					TBC1D32
	SLC15A5					ENS-1
	MGST1					NT5DC1
	LMO3					COL10A1
	RERGL					FRK
	CAPZA3					CRYBG1
	PLEKHA5					ATG5
	AEBP2					POPDC3
	PDE3A					BVES
	SLCO1C1					LIN28B
	SLCO1B3					FBXL4
	SLCO1A2					POU3F2
	IAPP					GPR63
	PYROXD1					FHL5
	RECQL					UFL1
	GOLT1B					FUT9
	USP6NL					HTR1B
	BCAT1					IMPG1
	SOX5					MYO6
	ETNK1					SENP6
	C2CD5					KHDRBS2
	ST8SIA1					COL21A1
	ECHDC3					BMP5
	C3AR1L					CSMD1
	CMAS					PGLS
	PROSER2					LIG1
	ABCC9					GR42L6
	KCNJ8					FFAR2L7
	LDHB					CHIR1AB3
	GYS2					ESPL1
	SPX					ACVR1B
	UPF2					FIGNL2
	IRAG2					TAMALIN
	DNAI7					NR4A1
	ETFRF1					ATG101
	KRAS					CSAD
	RASSF8					ZNF740
	BHLHE41					ITGB7
	SSPN					MFSD5
	DHTKD1					RARG
	SEC61A2					SPRYD3
	INTS13					SCN8A
	FGFR1OP2					PSMB5
	TM7SF3					VKORC1
	MED21					KAT8
	STK38L					BCKDK
	NUDT5					ZC4H2
	ARNTL2					ZC3H12B
	CDC123					LAS1L
	A4GALT					CDX4B
	ARFGAP3					CHIC1
	CAMK1D					FGF16
	MPPED1					MAGT1
	SULT4A1					COX7B
	PNPLA3					ATP7A
	SAMM50					PGK2
	PARVB					AMOT
	PARVG					TRPC5
	SHISAL1					ALG13
	PRR5					DCX
	ARHGAP8					CAPN6
	PHF21B					TENM1
	NUP50					SH2D1A
	ATXN10					C1GALT1C1
	WNT7B					MCTS1
	CCDC3					CUL4B
	PPARA					LAMP2
	CDPF1					ATP1B4
	PKDREJ					TMEM255A
	ZC3HAV1					ZBTB33
	ETV6					NKAPL
	MANSC1					AKAP14
	OPTN					NDUFA1
	MCM10					UPF3B
	PHYH					RPL39L
	SEPHS1					FMR1NB
	BEND7					FMR1
	PRPF18					SLITRK2
	FRMD4A					TRIM2
	AICDA					MND1
	MFAP5					SFRP2
	RIMKLB					TLL1
	PHC1					PCDH18
	M6PR					ANAPC10
	OVST					HHIP
	CD86					ABCE1
	CASR					OTUD4
	CSTB					AR
	CSTA					LRBA
	CCDC58					FHIP1A
	FAM162A					CCSER1
	KPNA1					GRID2
	FBXO40					SGMS2
	TAPBPL					PAPSS1
	SCNN1A					GIMD1
	VAMP1					AIMP1
	MRPL51					TBCK
	NCAPD2					STOX2
	CNP1					TRAPPC11
	GAPDH					RWDD4
	IFFO1					ING2
	NOP2					CDKN2AIP
	CHD4					AGA
	LPAR5					NEIL3
	ACRBP					GALNTL6
	ING4					BMP3
	ZNF384					RASGEF1B
	PIANP					PRKG2
	COPS7A					PKD2
	MLF2					SPP1
	CASP2					TECRL
	RAP1GAP3					AFP
	GSTK1					RASSF6
	TRPV6					IL8L1
	FAM107B					IL8L2
	PRSS3					EPHA5
	YBX3					PRDM5
	SYCE3					DIAPH2
	STYK1					F11
	HSD3B1					MTNR1A
	GABARAPL1					FAT1
	TMEM52B					DLC1
	HAO2					DTHD1
	POLQ					RBPJ
	SUV39H2					SMIM20
	STXBP5L					SEL1L3
	DCLRE1C					SLIT2
	MEIG1					RAB28
	GTF2E1					MAN2B2
	RABL3					KLHL4
	HGD					RGS12
	NDUFB4					DACH2
	TMEM243					MSANTD1
	GPR156					HAUS3
	GSK3B					POLN
	CFAP91					NAT8L
	COX17					HDX
	POPDC2					RPS6KA6
	PLA1A					POU3F4
	ELAPOR2					SOX6
	IGSF11					C11orf58
	GRM3					EHD4
	GAP43					MED6
	QTRT2					TTC9
	CCDC191					SYNJ2BP
	ZDHHC23					KATNBL1
	GRAMD1C					MEIS2
	APOV1					CDIN1
	ILDR1					SEC23A
	CFAP44					GEMIN2
	BOC					TRAPPC6A
	DPT					PNN
	XCL1					FBXO33
	TBX19					ZNF410
	SFT2D2					FAM161B
	TIPRL					COQ6
	GPR161					ENTPD5
	CPOX					ALDH6A1
	ST3GAL6					TTLL5
	COL8A1					TGFB3
	DCBLD2					IFT43
	TMEM30CP					VASH1
	CMSS1					ANGEL1
	FILIP1L					STON2
	TBC1D23					SEL1L
	NIT2					FLRT2
	TOMM70					SYNE3
	LNP1					GLRX5
	TMEM45A					TUNAR
	ADGRG7					C14orf132
	TFG					WDR25
	ABI3BP					BEGAIN
	IMPG2					DLK1
	TXNL4B					DIO3
	TRMT10C					EXOC3L4
	PCNP					TNFAIP2
	ZBTB11					EIF5
	RPL24					TRMT61A
	CEP97					BAG5
	NXPE3					COA8
	NFKBIZ					KLC1
	ZPLD1					XRCC3
	ALCAM					ZFYVE21
	BBX					SYT16
	CD47
	IFT57
	HHLA2
	MYH15
	NECTIN3
	PLCXD2
	PHLDB2
	ABHD10
	TAGLN3
	TMPRSS7
	C1H3ORF52
	CD200L
	CD200
	CGGBP1
	ZNF654
	C3orf38
	EPHA3
	PROS1
	ARL13B
	STX19
	NSUN3
	MINA
	GABRR3
	DCAF6
	GPA33
	STYXL2
	MAEL
	ILDR2
	ZFP92
	PTGFRN
	CD88
	TIMMDC1
	POGLUT1
	BCL9
	ACP6
	GJA8
	GJA5
	GPR89A
	PDZK1
	HTR1F
	RBM11
	SAMSN1
	NRIP1
	USP25
	CXADR
	C21orf91
	CHODL
	SLC24A5
	MYEF2
	CTXN2
	ZNF592
	SEC11A
	NMB
	DUOX2
	SORD
	SLC12A1
	DUT
	FBN1
	SHC4
	RBPMS2
	SECISBP2L
	COPS2
	GALK2
	FGF7
	FAM227B
	AFG2B
	C10H15ORF48
	SLC30A4
	SQOR
	BLOC1S6
	ITGB1BP3
	SPPL2A
	TRPM7
	OAZ2
	USP8
	GABPB1
	HDC
	ZNF609
	GATM
	PDE8A
	FSD2
	WHAMM
	HOMER2
	TRIP4
	BTBD1
	TM6SF1
	HDGFL3
	BNC1
	SH3GL3
	ADAMTSL3
	CSNK1G1
	SAXO2
	EFL1
	MEX3B
	TMC3
	STARD5
	CFAP161
	TLNRD1
	MESDC2
	CEMIP
	ABHD17C
	ARNT2
	CTXND1
	FAH
	ZFAND6
	BCL2A1
	MTHFS
	MINAR1
	PEX11A
	PLIN1
	KIF7
	TICRR
	RHCG
	POLG
	FANCI
	RLBP1
	ABHD2
	MFGE8
	HAPLN3
	ACAN
	DET1
	MRPS11
	MRPL46
	NTRK3
	AGBL1
	KLHL25
	AKAP13
	SV2B
	SLCO3A1
	ST8SIA2
	FAM174B
	CHD2
	RGMA
	MCTP2
	NR2F2
	ARRDC4
	PGPEP1L
	LRRC28
	MEF2A
	LYSMD4
	ASB7
	ALDH1A3
	LRRK1
	CHSY1
	SELENOS
	PCSK6
	PLEKHO2
	ANKDD1A
	SMAD3
	AAGAB
	IQCH
	C15orf61
	MAP2K5
	SKOR1
	PIAS1
	CALML4
	CLN6
	FEM1B
	ITGA11
	CORO2B
	NOX5
	GLCE
	PAQR5
	KIF23
	TLE3
	UACA
	MORF4L2
	ADAMTS7
	FAM96A
	SPG11
	EIF3J
	CTDSPL2
	CASC4
	FRMD5
	WDR76
	BLM
	CTSH
	RASGRF1
	UNC45A
	MAN2A2
	FES
	FURIN
	MFAP1
	HYPK
	SERINC4
	SERF2
	TP53BP1
	TUBGCP4
	IQGAP1
	INSYN1
	LOXL1
	PPCDC
	SCAMP5
	RPP25
	FAM219B
	MPI
	COX5A
	SCAMP2
	ULK3
	CPLX3
	CSK
	CYP1A2
	CYP1A1
	EDC3
	CLK3
	ARID3B
	ACTG1L
	UBL7
	SEMA7A
	CYP11A1
	STRA6
	ISLR2
	ISLR
	STOML1
	ZP3
	COMMD4
	NEIL1
	MAN2C1
	SIN3A
	PTPN9
	SNUPN
	SNX33
	CSPG4
	LINGO1
	HMG20A
	PEAK1
	TSPAN3
	SCAPER
	PSTPIP1
	RCN2
	ISL2
	ETFA
	TMEM266
	NRG4
	FBXO22
	UBE2Q2
	CHRNB4
	CHRNA3
	CHRNA5
	PSMA4
	IREB2
	CRABP1
	WDR61
	ACSBG1
	IDH3A
	CIB2
	TBC1D2B
	DAPK2
	HERC1
	FBXL22
	USP3
	CA12
	RAB8B
	RPS27L
	LACTB
	TPM1
	TLN2
	VPS13C
	RORA
	ICE2
	ANXA2
	FOXB1
	BNIP2
	GTF2A2
	GCNT3
	OTUD7A
	KLF13
	TRPM1
	MTMR10
	FAN1
	MPHOSPH10
	MCEE
	APBA2
	ENTREP2
	CHRNA7
	FAM81A
	AQP9
	MYZAP
	CGNL1
	TCF12
	ZNF280D
	MNS1
	TEX9
	NEDD4
	PRTG
	PYGO1
	DNAAF4
	CCPG1
	SHF
	PIGB
	RAB27A
	PIGBOS1
	RSL24D1
	UNC13C
	ALPK3
	WDR72
	ONECUT1
	FAM214A
	ARPP19
	MYO5A
	MYO5C
	GNB5
	BCL2L10
	MAPK4
	LEO1
	TMOD3
	TMOD2
	LYSMD2
	SCG3
	AP4E1
	TNFAIP8L3
	CYP19A1
	GLDN
	DMXL2
	SEMA6D
	PEPD
	PSKH1
	CTRL
	EXOC3L1
	E2F4
	ELMO3
	TMEM208
	MATCAP1
	LCAT
	PLA2G15
	CHST8
	RIPOR1
	KCTD15
	CTCF
	LSM14A
	SS18L2
	GARRE1
	CARMIL2
	CIAO2B
	RRAD
	PDP2
	CA7
	NAE1
	DYNC1LI2
	CMTM4
	CMTM3
	CKLF
	TK2
	AARS1
	SMPD3
	BEAN1
	CDH5
	EXOSC6
	ZDHHC1
	TPPP3
	CDH11
	PLEKHG4
	CDH8
	SLC9A5
	FHOD1
	HSD11B2
	ATP6V0D1
	SETD6
	NUDT7
	VAT1L
	CLEC3A
	SLC38A7
	GOT2
	MAF
	CALB2
	CMC2
	CENPN
	ATMIN
	PPP1R3E
	GCSH
	PKD1L2
	BCO1
	PRMT7
	MLYCD
	KCNG4
	WFDC1
	ATP2C2
	MTSS2
	TLDC1
	COTL1
	KLHL36
	SF3B3
	HNF4beta
	ZDHHC7
	COG4
	FCSK
	FOXL1
	FOXC2
	MTHFSD
	FOXF1
	ST3GAL2
	PDPR
	IRF8
	COX4I1
	EMC8
	GSE1
	GLG1
	FBXO31
	MAP1LC3B
	ZCCHC14
	JPH3
	KLHDC4
	SLC7A5
	CA5B
	ZFPM1
	RFWD3
	CIDEC
	ZC3H18
	IL17C
	CYBA
	MVD
	RNF166
	CTU2
	PIEZO1
	SLC7A6OS
	CDT1
	APRT
	GALNS
	TRAPPC2L
	CBFA2T3
	MLKL
	ACSF3
	CDH15
	SLC22A31
	FA2H
	HAS3
	CHTF8
	UTP4
	ZFHX3
	DHX38
	DHODH
	IST1
	ZNF821
	ATXN1L
	PHLPP2
	MARVELD3
	KARS1
	TERF2IP
	ADAT1
	GABARAPL2
	TMEM231
	CHST6
	MT3
	CBFB
	PHAF1
	B3GNT9
	TRADD
	FBXL8
	DNAAF1
	HSDL1
	MBTPS1
	SLC38A8
	NECAB2
	ESRP2
	NFATC3
	DUS2
	DDX28
	GALR1L
	DPEP2
	SLC12A4
	SLC6A2
	LPCAT2
	MMP2
	MMP15
	ZNF319
	USB1
	IRX6
	KIFC3
	IRX5
	KATNB1
	IRX3
	DRC7
	UMOD
	ADGRG3
	ADGRG1
	ADGRG5
	CCDC102A
	DOK4
	POLR2C
	COQ9
	CIAPIN1
	GFOD2
	ENKD1
	CETP
	PARD6A
	HERPUD1
	NLRC5
	CPNE2
	SNX20
	NKD1
	FAM192A
	BRD7
	ADCY7
	TENT4B
	CNEP1R1
	ZNF423
	ARL2BP
	CBLN1
	ARL2BPL
	N4BP1
	SIAH1
	LONP2
	PHKB
	PLLP
	CX3CL1
	CCL17
	ITFG1
	NETO2
	CDCA9
	GPT2
	RANBP10
	C16orf87
	MYLK3
	ORC6
	VPS35
	SHCBP1
	UQCRFS1
	VSTM2B
	POP4
	PLEKHF1
	C19orf12
	CCNE1
	URI1
	CENPT
	NUTF2
	ZNF536
	EDC4
	PDCD5
	ANKRD27
	RGS9BP
	NUDT19
	SLC7A9
	CEP89
	FAAP24
	RHPN2
	GPATCH1
	LRP3
	SLC7A10
	CEBPA
	CEBPG
	PLXNA1
	SFMBT1
	TXNRD3
	CHST13
	SLC41A3
	KLF15
	UROC1
	CHCHD4
	TMEM43
	XPC
	LSM3
	SLC6A6
	RRP9
	GRIP2
	CCDC174
	SETD5
	LHFPL4
	MTMR14
	CPNE9
	BRPF1
	OGG1
	CAMK1
	TADA3
	ARPC4
	IL17RC
	RPUSD3
	JAGN1
	CRELD1
	CCDC36
	KLHDC8B
	CCDC71
	LAMB2
	QARS
	QRICH1
	IMPDH2
	NDUFAF3
	DALRD3
	P4HTM
	ARIH2
	SLC25A20
	PRKAR2A
	HTD2
	PXK
	PDHB
	KCTD6
	ACOX2
	FAM107A
	FAM3D
	CFAP20DC
	RFT1
	FHIT
	PTPRG
	PRKCD
	CEP15
	FEZF2
	SYP
	SNTN
	PFKFB4
	THOC7
	ATXN7
	PSMD6
	PRICKLE2
	ADAMTS9
	MAGI1
	HYAL1
	HYAL2
	TUSC2
	RASSF1
	ZMYND10
	CYB561D2
	SLC25A26
	TMEM115
	CACNA2D2
	LRIG1
	KBTBD8
	SUCLG2
	TAFA1
	TAFA4
	EOGT
	TMF1
	UBA3
	ARL6IP5
	LMOD3
	FRMD4B
	MITF
	RYBP
	GXYLT2
	PPP4R2
	PDZRN3
	CNTN3
	CHL1
	C3orf18
	HEMK1
	CNTN6
	CNTN4
	IL5RA
	TRNT1
	CRBN
	LRRN1
	CISH
	SUMF1
	ITPR1
	MAPKAPK3
	BHLHE40
	ARL8B
	EDEM1
	GRM7
	LMCD1
	CAV3
	OXTR
	RAD18
	SRGAP3
	THUMPD3
	IRAK2
	GHRL
	SEC13
	RPL32
	MBD4
	IFT122
	RHO
	PLXND1
	TMCC1
	TRH
	RBSN
	MRPS25
	NR2C2
	FGD5
	DUSP7
	MANF
	RBM15B
	DCAF1
	GBP
	RNF123
	GMPPB
	AMIGO3
	IP6K1
	FAM212A
	AMT
	NICN1
	DAG1
	MST1
	APEH
	BSN
	TRAIP
	MST1R
	MON1A
	RBM6
	RAD54L2
	FANCD2
	ALAS1
	TWF2
	PPM1M
	WDR82
	GLYCTK
	DNAH1
	BAP1
	ACY1
	ABHD14A
	PCBP4
	PARP3
	RBM10
	SEMA3F
	GNAT1
	GNAI2
	SLC38A3
	SEMA3B
	OASL
	HYAL3
	NAA80
	SHISA5
	ATRIP
	ECM2
	ASPN
	OMD
	OGN
	CENPP
	NOL8
	CFAP92
	ACAD9
	IQSEC1
	RPL29
	TNNC1
	NISCH
	STAB1
	PTPDC1
	BARX1
	PHF2
	FAM120A
	NT5DC2
	WNK2
	NINJ1
	SMIM4
	SUSD3
	FGD3
	PBRM1
	BICD2
	TKT
	DCP1A
	CACNA1D
	GNL3
	GLT8D1
	SPCS1
	NEK4
	LRTM1
	ITIH3
	WNT5A
	MUSTN1
	STIMATE
	ARHGEF3
	IL17RD
	HESX1
	APPL1
	ASB14
	DNAH12
	ARF4
	PDE12
	DENND6A
	SLMAP
	FLNB
	ABHD6
	DNASE1L3
	IP6K2
	NCKIPSD
	CELSR3
	SLC26A6
	UQCRC1
	H1-10
	HMCES
	RAB7A
	GATA2
	EEFSEC
	RUVBL1
	SEC61A1
	KBTBD12
	MGLL
	ABTB1
	MCM2
	TPRA1
	FAF2
	CLTB
	NOP16
	ARL10
	KIAA1191
	SIMC1
	THOC3
	CPLX2
	HRH2
	PCDHA6
	SPINK5
	SPINK7
	UBLCP1
	RNF145
	EBF1
	CLINT1
	LSM11
	THG1L
	SOX30
	ADAM19
	NIPAL4
	CYFIP2
	FNDC9
	ITK
	MED7
	HAVCR1
	SGCD
	SRA1
	EIF4EBP3
	MRPL22
	GEMIN5
	CNOT8
	FAXDC2
	LARP1
	HAND1
	SAP30L
	GALNT10
	PCDHB4
	MFAP3
	FAM114A2
	GRIA1
	GLRA1
	SLC36A1
	GM2A
	CSF1R
	HMGXB3
	NPY7R
	FLT4
	RNF130
	TBC1D9B
	MRNIP
	SQSTM1
	MGAT4B
	LTC4S
	MAML1
	CANX
	HNRNPH1
	DCK2
	RUFY1
	ADAMTS2
	CNOT6
	GFPT2
	MAPK9
	RASGEF1C
	HNRNPAB
	PHYKPL
	NME5
	WNT8A
	FAM13B
	PKD2L2
	KLHL3
	NPY6R
	HNRNPA0
	SPOCK1
	TRPC7
	SMAD5
	TGFBI
	LECT2
	FBXL21
	IL9
	SLC25A48
	CXCL14
	NEUROG1
	H2AFYMACROH2A1
	PITX1
	PCBD2
	TXNDC15
	C5orf24
	DDX46
	CAMLG
	SEC24A
	SAR1B
	JADE2
	UBE2B
	PPP2CA
	SKP1
	TCF7
	VDAC1
	C5orf15
	FSTL4
	RAPGEF6
	SLC4A9
	FNIP1
	CSF2
	IL3
	KK34
	P4HA2
	PDLIM4
	SLC22A4
	SLC22A5
	IRF1
	IL5
	RAD50
	IL13
	IL4
	KIF3A
	CCNI2
	SEPTIN8
	SOWAHA
	GDF9
	UQCRQ
	LEAP2
	AFF4
	ZCCHC10
	RNF14
	GNPDA1
	NDFIP1
	SPRY4
	FGF1
	ARHGAP26
	YIPF5
	KCTD16
	GRXCR2
	SH3RF2
	LARS1
	RBM27
	POU4F3
	TCERG1
	HBEGF
	PFDN1
	ETF1
	FBXW11
	FGF18
	NPM1
	TLX3
	RANBP17
	GABRP
	PANK3
	RARS
	WWC1
	PSD2
	MAT2B
	NUDCD2
	HMMR
	CCNG1
	CXXC5
	GABRG2
	GABRA1
	GABRA6
	UBE2D2
	TMEM173
	PTTG2
	SLU7
	C1QTNF2
	CCNJL
	FABP6
	SLC35A4
	PWWP2A
	CD14
	TMCO6
	NDUFA2
	IK
	DND1
	WDR55
	HTR4
	HARS1
	SLC26A2
	ZMAT2
	PPARGC1B
	ARHGEF37
	CSNK1A1
	IL17B
	PCYOX1L
	GRPEL2
	AFAP1L1
	ABLIM3
	SH3TC2
	ADRB2
	UBTD2
	STK10
	SH3PXD2B
	NEURL1B
	DUSP1
	ERGIC1
	RPL26L1
	ATP6V0E1
	CREBRF
	BNIP1
	NKX2-5
	STC2
	CPEB4
	HMP19
	MSX2
	DRD1
	SFXN1
	KIF20A
	BRD8
	N4BP3
	GRK6
	B4GALT7
	NHP2
	LMAN2
	RGS14
	SLC34A1
	PRR7
	DBN1
	PDLIM7
	DOK3
	DDX41
	FAM193B
	MXD3
	PRELID1
	RAB24
	NSD1
	ZNF346
	FGFR4
	UIMC1
	HK3
	UNC5A
	SNCB
	CDHR2
	RNF44
	PMM2
	TMEM186
	ABAT
	CCZ1
	LMTK2
	OCM1
	OCM3
	METTL22
	TMEM114
	BHLHA15
	TECPR1
	BAIAP2L1
	RBFOX1
	NPTX2
	IL20RB
	GSG1L
	KATNIP
	GTF3C1
	POLR3K
	SNRNP25
	RHBDF1
	MPG
	NPRL3
	HBZ
	HBAD
	HBA1
	PGAP6
	MRPL28
	AXIN1
	PDIA2
	ARHGDIG
	RGS11
	FAM234A
	LUC7L
	PERCC1
	CLCN7
	TMEM130
	ECI1
	DNASE1L2
	DNASE1
	INTS15
	NAA60
	NUDT16L1
	TRRAP
	CREBBP
	ADCY9
	SRL
	GLIS2
	VASN
	CORO7
	NMRAL1
	NLRC3
	CLUAP1
	ANKS3
	SBK1
	XPO6
	DECR2
	RAB11FIP3
	SEPTIN12
	MSS51
	CFAP70
	WDR90
	RHOT2
	RHBDL1
	STUB1
	JMJD8
	WDR24
	FBXL16
	METRN
	FAM173A
	CCDC78
	IGFALS
	NUBP2
	SPSB3
	EME2
	NME3
	UBN1
	PPL
	SEC14L5
	NAGPA
	C16orf89
	EEF2KMT
	NDUFB6
	CAPN15
	PRR35
	PIGQ
	RAB40C
	WFIKKN1
	MCRIP2
	TELO2
	RNPS1
	AMDHD2
	ATP6V0C
	TBC1D24
	NTN3
	NOG2
	MAPK8IP3
	MRPS34
	GLYR1
	ROGDI
	MCHR2
	ACSM5
	PDILT
	GPR139
	GPRC5B
	VPS35L
	THUMPD1
	ACSM3
	ERI2
	REXO5
	DCUN1D3
	LYRM1
	DNAH3
	FOXL3
	PDGFA
	PRKAR1B
	SUN1
	GET4
	ADAP1
	COX19
	CYP2AC7
	CYP2W1
	C7orf50
	GPR146
	GPER1
	UNCX
	MICALL2
	INTS1
	MAFK
	TMEM184A
	ELFN1
	MAD1L1
	MRM2
	NUDT1
	SNX8
	EIF3B
	CHST12
	GRIFIN
	AMZ1
	GNA12
	CARD11
	CYP3A4
	CYP3A5
	FOXK1
	AP5Z1
	RADIL
	MMD2
	WIPI2
	SLC29A4
	TNRC18
	FBXL18
	FSCN1
	RNF216
	SMURF1
	ARPC1A
	ARPC1B
	BUD31
	PTCD1
	CPSF4
	ATP5J2
	KCNJ12
	MAP2K3
	NATD1
	TMEM11
	DHRS7B
	USP22
	TNFRSF13B
	MPRIP
	FLCN
	PLD6
	COPS3
	NT5M
	MED9
	RASD1
	PEMT
	RAI1
	SREBF1
	TOM1L2
	DRC3
	DRG2
	ATPAF2
	GID4
	MYO15A
	ALKBH5
	LLGL1
	FLII
	MIEF2
	TOP3A
	SHMT1
	PRPSAP2
	SLC5A10
	FAM83G
	GRAPL
	EPN2
	B9D1
	CACNA1H
	C1QTNF8
	SSTR5
	SOX8
	LMF1
	GNG13
	CHTF18
	RPUSD1
	NARFL
	HAGHL
	FAHD1
	HAGH
	MEIOB
	HS3ST6
	MSRB1
	RPL3L
	NDUFB10
	RPS2
	TBL3
	NOXO1
	GFER
	SYNGR3
	ZNF598
	NHERF2
	NTHL1
	TSC2
	PKD1
	RAB26
	TRAF7
	CASKIN1
	MLST8
	BRICD5
	PGP
	E4F1
	ZDHHC4
	GRID2IP
	SLC5A11
	ARHGAP17
	LCMT1
	AQP8
	PRKCB
	CACNG3
	RBBP6
	TNRC6A
	NDUFAB1
	PALB2
	DCTN5
	PLK1
	ERN2
	UBFD1
	EARS2
	GGA2
	COG7
	SCNN1B
	SCNN1G
	USP31
	HS3ST2
	HS3ST4
	PARN
	KDM8
	NSMCE1
	IL21R
	PDPK1
	UBE2I
	TSR3
	GNPTG
	BFAR
	NDE1
	MYH11
	PLA2G10
	FOPNL
	ABCC1
	ABCC6
	XYLT1
	ZC3H7A
	TXNDC11
	SNN
	RPS15A
	ARL6IP1
	SMG1
	CLEC19A
	SYT17
	ITPRIPL2
	COQ7
	LITAF
	TMC5
	GDE1
	CCP110
	MOSMO
	VWA3A
	SDR42E2
	EEF2K
	POLR3E
[truncated: 5,238 more rows]
